# Supplementary material for: Identification of Chemical Profiles and Biological Properties of Rhizophora racemosa G. Mey. Extracts Obtained by Different Methods and Solvents
Source: MDPI journal article supplement (doi:10.3390/antiox9060533), 2020-06-18
Supplement: s1 [file s1]

# Identification of chemical profiles and biological properties of *Rhizophora racemosa* G. Mey. extracts obtained by different methods and solvents

Annalisa Chiavaroli <sup>1</sup>, Koaudio Ibrahime Sinan<sup>2</sup>, Gokhan Zengin <sup>2,\*</sup>, Mohamad Fawzi Mahomoodally<sup>3,4</sup>, Nabeelah Bibi Sadeer<sup>4</sup>, Ouattara Katinan Etienne<sup>5</sup>, Zoltán Cziáky<sup>6</sup>, József Jekő<sup>6</sup>, Jasmina Glamocilja<sup>7</sup>, Marina Sokovic<sup>7</sup>, Lucia Recinella <sup>1</sup>, Luigi Brunetti <sup>1</sup>, Sheila Leone <sup>1</sup>, Hassan H. Abdullah<sup>8,9</sup>, Paola Angelini <sup>10,\*</sup>, Giancarlo Angeles Flores <sup>10</sup>, Roberto Venanzoni <sup>10</sup>, Luigi Menghini <sup>1</sup>, Giustino Orlando <sup>1\*</sup> and Claudio Ferrante <sup>1</sup>

<sup>1</sup> Department of Pharmacy, University “G. d’Annunzio” of Chieti-Pescara, 66100 Chieti, Italy; giustino.orlando@unich.it (G.O.); lucia.recinella@unich.it (L.R.); annalisa.chiavaroli@unich.it (A.C.); luigi.brunetti@unich.it (L.B.); sheila.leone@unich.it (S.L.); [luigi.menghini@unich.it](mailto:luigi.menghini@unich.it) (L.M.); claudio.ferrante@unich.it (C.F.);

<sup>2</sup> Department of Biology, Science Faculty, Selcuk Universtiy, Campus, Konya, 42130 Konya, Turkey; [sinankouadio@gmail.com](mailto:sinankouadio@gmail.com) (KIS) and [gokhanzengin@selcuk.edu.tr](mailto:gokhanzengin@selcuk.edu.tr) (G.Z),

<sup>3</sup> Department for Management of Science and Technology Development, Ton Duc Thang University, Ho Chi Minh City, Vietnam

<sup>4</sup> Department of Health Sciences, Faculty of Science, University of Mauritius, 230 Réduit, Mauritius; [nabeelah.sadeer1@uom.ac.mu](mailto:nabeelah.sadeer1@uom.ac.mu) (N.B.S) and [f.mahomoodally@uom.ac.mu](mailto:f.mahomoodally@uom.ac.mu) (M.F.M)

<sup>5</sup> Laboratoire de Botanique, UFR Biosciences, Université Félix Houphouët-Boigny, Abidjan, Côte d’Ivoire; [katinan.etienne@gmail.com](mailto:katinan.etienne@gmail.com) (O.K.E)

<sup>6</sup> Agricultural and Molecular Research and Service Institute, University of Nyíregyháza, Nyíregyháza, Hungary; [cziaiky.zoltan@nye.hu](mailto:cziaiky.zoltan@nye.hu) (C.Z) and [jjozsi@gmail.com](mailto:jjozsi@gmail.com) (J.J)

<sup>7</sup> University of Belgrade, Department of Plant Physiology, Institute for Biological Research “Siniša Stanković”, National Institute of Republic of Serbia, Bulevar Despota Stefana 142, 11000 Belgrade, Serbia; [jasna@ibiss.bg.ac.rs](mailto:jasna@ibiss.bg.ac.rs) (J.G.) and [marina.sokovic@mpn.gov.rs](mailto:marina.sokovic@mpn.gov.rs) (M.S)

<sup>8</sup> Chemistry department, College of Education, Salahaddin University-Erbil, Erbil 44001, Iraq; [hassan.abdallah@su.edu.krd](mailto:hassan.abdallah@su.edu.krd)

<sup>9</sup> School of Pharmaceutical Sciences, Universiti Sains Malaysia, USM, Penang, 11800, Malaysia

<sup>10</sup> Department of Chemistry, Biology and Biotechnology, University of Perugia, 06100 Perugia, Italy; (G.A.F.); [roberto.venanzoni@unipg.it](mailto:roberto.venanzoni@unipg.it) (R.V.), [paola.angelini@unipg.it](mailto:paola.angelini@unipg.it) (P.A.);

\* Correspondence: [gokhanzengin@selcuk.edu.tr](mailto:gokhanzengin@selcuk.edu.tr) (G.Z.); [paola.angelini@unipg.it](mailto:paola.angelini@unipg.it) (P.A.); [giustino.orlando@unich.it](mailto:giustino.orlando@unich.it) (G.O.)

## Chemical composition

Chemical compositions of the *R. racemosa* extracts were determined using a Dionex Ultimate 3000RS UHPLC instrument. The extracts were filtered through 0.22  $\mu\text{m}$  PTFE syringe filter (Labex Ltd, Hungary) before HPLC analysis. The compounds were separated on a Thermo Accucore C18 (100 mm x 2.1, mm i. d., 2.6  $\mu\text{m}$ ) column thermostated at 25 °C ( $\pm$  1 °C). The solvents used were water (A) and methanol (B), both were acidified with 0.1 % formic acid. The flow rate was maintained at 0.2 mL min<sup>-1</sup>. The elution gradient was isocratic 5 % B (0-3 min), a linear gradient increasing from 5% B to 100% (3-43 min), 100% B (43-61 min), a linear gradient decreasing from 100% B to 5% (61-62 min) and 5% B (62-70 min). The column was coupled to a Thermo Q Exactive Orbitrap mass spectrometer (Thermo Scientific, USA) equipped with electrospray ionization source. MS spectra were recorded in positive and negative-ion mode, respectively.

Trace Finder 3.1 (Thermo Scientific, USA) software was applied for target screening. The compounds listed in the tables were identified on the basis our previous published works or data found in literature using exact molecular mass, isotopic pattern and characteristic fragment ions. In every case, the exact molecular mass, isotopic pattern, characteristic fragment ions and retention time were used for the identification of the compounds which are marked that were confirmed by standards.

### *Assays for Total Phenolic and Flavonoid Contents*

The total phenolic content was determined by employing the methods given in the literature with some modification. Sample solution (0.25 mL) was mixed with diluted Folin–Ciocalteu reagent (1 mL, 1:9, v/v) and shaken vigorously. After 3 min, Na<sub>2</sub>CO<sub>3</sub> solution (0.75 mL, 1%) was added and the sample absorbance was read at 760 nm after a 2 h incubation at room temperature. The total phenolic content was expressed as milligrams of gallic acid equivalents (mg GAE/g extract)[1].

The total flavonoid content was determined using the AlCl<sub>3</sub> method. Briefly, sample solution (1 mL) was mixed with the same volume of aluminum trichloride (2%) in methanol. Similarly, a blank was prepared by adding sample solution (1 mL) to methanol (1 mL) without AlCl<sub>3</sub>. The sample and blank absorbances were read at 415 nm after a 10 min incubation at room temperature. The absorbance of the blank was subtracted from that of the sample. Rutin was used as a reference standard and the total flavonoid content was expressed as milligrams of rutin equivalents (mg RE/g extract) [1].

### *Determination of Antioxidant and Enzyme Inhibitory Effects*

Antioxidant (DPPH and ABTS radical scavenging, reducing power (CUPRAC and FRAP), phosphomolybdenum and metal chelating (ferrozine method)) and enzyme inhibitory activities (cholinesterase (Eldmann's method), tyrosinase (dopachrome method),  $\alpha$ -amylase (iodine/potassium iodide method),  $\alpha$ -glucosidase (chromogenic PNPG method) and pancreatic lipase (*p*-nitrophenyl butyrate (*p*-NPB) method) were determined using the methods previously described by Uysal et al. [1] and Grochowski et al. [2]

For the DPPH (1,1-diphenyl-2-picrylhydrazyl) radical scavenging assay: Sample solution was added to 4 mL of a 0.004% methanol solution of DPPH. The sample absorbance was read at 517 nm after a 30 min incubation at room temperature in the dark. DPPH radical scavenging activity was expressed as milligrams of trolox equivalents (mg TE/g extract).

For ABTS (2,2'-azino-bis(3-ethylbenzothiazoline) 6-sulfonic acid) radical scavenging assay: Briefly, ABTS<sup>+</sup> was produced directly by reacting 7 mM ABTS solution with 2.45 mM potassium persulfate and allowing the mixture to stand for 12–16 h in the dark at room temperature. Prior to beginning the assay, ABTS solution was diluted with methanol to an absorbance of  $0.700 \pm 0.02$  at 734 nm. Sample solution was added to ABTS solution (2 mL) and mixed. The sample absorbance was read at 734 nm after a 30 min incubation at room temperature. The ABTS radical scavenging activity was expressed as milligrams of trolox equivalents (mg TE/g extract).

For CUPRAC (cupric ion reducing activity) activity assay: Sample solution was added to premixed reaction mixture containing CuCl<sub>2</sub> (1 mL, 10 mM), neocuproine (1

mL, 7.5 mM) and  $\text{NH}_4\text{Ac}$  buffer (1 mL, 1 M, pH 7.0). Similarly, a blank was prepared by adding sample solution (0.5 mL) to premixed reaction mixture (3 mL) without  $\text{CuCl}_2$ . Then, the sample and blank absorbances were read at 450 nm after a 30 min incubation at room temperature. The absorbance of the blank was subtracted from that of the sample. CUPRAC activity was expressed as milligrams of trolox equivalents (mg TE/g extract).

For FRAP (ferric reducing antioxidant power) activity assay: Sample solution was added to premixed FRAP reagent (2 mL) containing acetate buffer (0.3 M, pH 3.6), 2,4,6-tris(2-pyridyl)-S-triazine (TPTZ) (10 mM) in 40 mM HCl and ferric chloride (20 mM) in a ratio of 10:1:1 (v/v/v). Then, the sample absorbance was read at 593 nm after a 30 min incubation at room temperature. FRAP activity was expressed as milligrams of trolox equivalents (mg TE/g extract).

For phosphomolybdenum method: Sample solution was combined with 3 mL of reagent solution (0.6 M sulfuric acid, 28 mM sodium phosphate and 4 mM ammonium molybdate). The sample absorbance was read at 695 nm after a 90 min incubation at 95 °C. The total antioxidant capacity was expressed as millimoles of trolox equivalents (mmol TE/g extract).

For metal chelating activity assay: Briefly, sample solution was added to  $\text{FeCl}_2$  solution (0.05 mL, 2 mM). The reaction was initiated by the addition of 5 mM ferrozine (0.2 mL). Similarly, a blank was prepared by adding sample solution (2 mL) to  $\text{FeCl}_2$  solution (0.05 mL, 2 mM) and water (0.2 mL) without ferrozine. Then, the sample and blank absorbances were read at 562 nm after 10 min incubation at room temperature. The absorbance of the blank was subtracted from that of the sample. The metal

chelating activity was expressed as milligrams of EDTA (disodium edetate) equivalents (mg EDTAE/g extract).

For Cholinesterase (ChE) inhibitory activity assay: Sample solution (was mixed with DTNB (5,5-dithio-bis(2-nitrobenzoic) acid, Sigma, St. Louis, MO, USA) (125  $\mu$ L) and AChE (acetylcholines-terase (Electric ell acetylcholinesterase, Type-VI-S, EC 3.1.1.7, Sigma)), or BChE (butyrylcholinesterase (horse serum butyrylcholinesterase, EC 3.1.1.8, Sigma)) solution (25  $\mu$ L) in Tris-HCl buffer (pH 8.0) in a 96-well microplate and incubated for 15 min at 25 °C. The reaction was then initiated with the addition of acetylthiocholine iodide (ATCI, Sigma) or butyrylthiocholine chloride (BTCl, Sigma) (25  $\mu$ L). Similarly, a blank was prepared by adding sample solution to all reaction reagents without enzyme (AChE or BChE) solution. The sample and blank absorbances were read at 405 nm after 10 min incubation at 25 °C. The absorbance of the blank was subtracted from that of the sample and the cholinesterase inhibitory activity was expressed as galanthamine equivalents (mgGALAE/g extract).

For Tyrosinase inhibitory activity assay: Sample solution was mixed with tyrosinase solution (40  $\mu$ L, Sigma) and phosphate buffer (100  $\mu$ L, pH 6.8) in a 96-well microplate and incubated for 15 min at 25 °C. The reaction was then initiated with the addition of L-DOPA (40  $\mu$ L, Sigma). Similarly, a blank was prepared by adding sample solution to all reaction reagents without enzyme (tyrosinase) solution. The sample and blank absorbances were read at 492 nm after a 10 min incubation at 25 °C. The absorbance of the blank was subtracted from that of the sample and the tyrosinase inhibitory activity was expressed as kojic acid equivalents (mgKAE/g extract).

For  $\alpha$ -amylase inhibitory activity assay: Sample solution was mixed with  $\alpha$ -amylase solution (ex-porcine pancreas, EC 3.2.1.1, Sigma) (50  $\mu$ L) in phosphate buffer

(pH 6.9 with 6 mM sodium chloride) in a 96-well microplate and incubated for 10 min at 37 °C. After pre-incubation, the reaction was initiated with the addition of starch solution (50 µL, 0.05%). Similarly, a blank was prepared by adding sample solution to all reaction reagents without enzyme ( $\alpha$ -amylase) solution. The reaction mixture was incubated 10 min at 37 °C. The reaction was then stopped with the addition of HCl (25 µL, 1 M). This was followed by addition of the iodine-potassium iodide solution (100 µL). The sample and blank absorbances were read at 630 nm. The absorbance of the blank was subtracted from that of the sample and the  $\alpha$ -amylase inhibitory activity was expressed as acarbose equivalents (mmol ACE/g extract).

For  $\alpha$ -glucosidase inhibitory activity assay: Sample solution was mixed with glutathione (50 µL),  $\alpha$ -glucosidase solution (from *Saccharomyces cerevisiae*, EC 3.2.1.20, Sigma) (50 µL) in phosphate buffer (pH 6.8) and PNPG (4-N-trophenyl- $\alpha$ -D-glucopyranoside, Sigma) (50 µL) in a 96-well microplate and incubated for 15 min at 37 °C. Similarly, a blank was prepared by adding sample solution to all reaction reagents without enzyme ( $\alpha$ -glucosidase) solution. The reaction was then stopped with the addition of sodium carbonate (50 µL, 0.2 M). The sample and blank absorbances were read at 400 nm. The absorbance of the blank was subtracted from that of the sample and the  $\alpha$ -glucosidase inhibitory activity was expressed as acarbose equivalents (mmol ACE/g extract).





Table S1. Chemical composition in the infusion of leaves

| No.             | Name                                              | Formula    | Rt    | [M + H] <sup>+</sup> | [M - H] <sup>-</sup> | Fragment 1 | Fragment 2 | Fragment 3 | Fragment 4 | Fragment 5 |
|-----------------|---------------------------------------------------|------------|-------|----------------------|----------------------|------------|------------|------------|------------|------------|
| 1 <sup>1</sup>  | Gallic acid (3,4,5-Trihydroxybenzoic acid)        | C7H6O5     | 2,49  |                      | 169,01370            | 125,0230   | 97,0281    | 81,0331    | 69,0330    |            |
| 2               | Protocatechuic acid (3,4-Dihydroxybenzoic acid)   | C7H6O4     | 5,50  |                      | 153,01879            | 109,0280   | 108,0203   | 91,0176    | 81,0330    |            |
| 3               | Neochlorogenic acid (5-O-Caffeoylquinic acid)     | C16H18O9   | 10,24 | 355,10291            |                      | 163,0389   | 145,0284   | 135,0442   | 117,0337   | 89,0389    |
| 4               | Hydroxybenzaldehyde                               | C7H6O2     | 13,08 | 123,04461            |                      | 105,0451   | 95,0496    | 81,0704    | 67,0549    | 53,0394    |
| 5               | 3-O-(4-Coumaroyl)quinic acid                      | C16H18O8   | 13,30 |                      | 337,09235            | 191,0553   | 173,0447   | 163,0389   | 119,0488   | 93,0330    |
| 6 <sup>1</sup>  | Catechin                                          | C15H14O6   | 14,00 |                      | 289,07121            | 245,0816   | 205,0499   | 203,0706   | 125,0230   | 109,0280   |
| 7               | Esculetin (6,7-Dihydroxycoumarin)                 | C9H6O4     | 14,73 | 179,03444            |                      | 151,0385   | 133,0285   | 123,0442   | 105,0337   | 89,0390    |
| 8 <sup>1</sup>  | Chlorogenic acid (3-O-Caffeoylquinic acid)        | C16H18O9   | 14,88 | 355,10291            |                      | 163,0389   | 145,0284   | 135,0441   | 117,0337   | 89,0389    |
| 9               | 3-O-Feruloylquinic acid                           | C17H20O9   | 15,13 |                      | 367,10291            | 193,0499   | 191,0539   | 173,0439   | 134,0361   |            |
| 10              | Caffeic acid                                      | C9H8O4     | 15,19 |                      | 179,03444            | 135,0438   | 107,0487   |            |            |            |
| 11              | Procyanidin B                                     | C30H26O12  | 15,69 |                      | 577,13460            | 451,1032   | 425,0884   | 407,0771   | 289,0720   | 125,0230   |
| 12              | Chryptochlorogenic acid (4-O-Caffeoylquinic acid) | C16H18O9   | 16,15 | 355,10291            |                      | 163,0389   | 145,0284   | 135,0442   | 117,0337   | 89,0389    |
| 13              | Cinchonain II isomer 1                            | C39H32O15  | 17,04 |                      | 739,16630            | 339,0515   | 289,0707   | 177,0187   |            |            |
| 14              | 2-Oxindole                                        | C8H7NO     | 17,23 | 134,06059            |                      | 106,0655   | 105,0338   | 79,0548    |            |            |
| 15              | Procyanidin C                                     | C45H38O18  | 17,33 |                      | 865,19799            | 695,1398   | 577,1348   | 407,0768   | 289,0720   | 125,0230   |
| 16              | 5-O-(4-Coumaroyl)quinic acid                      | C16H18O8   | 17,45 |                      | 337,09235            | 191,0553   | 173,0444   | 163,0389   | 119,0488   | 93,0330    |
| 17 <sup>1</sup> | Epicatechin                                       | C15H14O6   | 17,61 |                      | 289,07121            | 245,0817   | 205,0498   | 203,0708   | 125,0230   | 109,0281   |
| 18              | Cinchonain II isomer 2                            | C39H32O15  | 17,91 |                      | 739,16630            | 587,1152   | 339,0512   | 289,0725   | 177,0182   |            |
| 19              | Cinchonain II isomer 3                            | C39H32O15  | 18,09 |                      | 739,16630            | 587,1201   | 339,0500   | 289,0728   | 177,0182   |            |
| 20              | 4-O-(4-Coumaroyl)quinic acid                      | C16H18O8   | 18,10 |                      | 337,09235            | 191,0554   | 173,0444   | 163,0389   | 119,0488   | 93,0330    |
| 21              | Antiarol (3,4,5-Trimethoxyphenol)                 | C9H12O4    | 18,50 | 185,08139            |                      | 170,0577   | 154,0623   | 153,0546   | 139,0389   | 125,0598   |
| 22              | 5-O-Feruloylquinic acid                           | C17H20O9   | 18,51 |                      | 367,10291            | 193,0495   | 191,0553   | 173,0443   | 134,0362   | 93,0329    |
| 23 <sup>1</sup> | 4-Coumaric acid                                   | C9H8O3     | 18,54 |                      | 163,03952            | 119,0488   | 93,0329    |            |            |            |
| 24              | Tuberonic acid or 12-Hydroxyjasmonic acid         | C12H18O4   | 18,77 |                      | 225,11269            | 181,1227   | 165,0903   | 147,0801   | 135,0804   | 59,0123    |
| 25              | 4-O-Feruloylquinic acid                           | C17H20O9   | 19,02 |                      | 367,10291            | 193,0499   | 191,0553   | 173,0445   | 134,0365   | 93,0329    |
| 26              | Riboflavin                                        | C17H20N4O6 | 19,09 | 377,14611            |                      | 359,1353   | 243,0877   | 172,0867   | 99,0445    | 69,0341    |
| 27              | Naringenin-C-hexoside isomer 1                    | C21H22O10  | 19,84 | 435,12913            |                      | 399,1093   | 339,0859   | 315,0850   | 285,0756   | 195,0291   |
| 28 <sup>1</sup> | Taxifolin (Dihydroquercetin)                      | C15H12O7   | 19,91 |                      | 303,05048            | 285,0402   | 175,0386   | 153,0181   | 125,0229   | 57,0331    |
| 29              | Quercetin-O-rhamnosyldihexoside                   | C33H40O21  | 20,29 |                      | 771,19839            | 301,0356   | 300,0277   | 299,0198   | 271,0249   | 255,0297   |
| 30              | Naringenin-C-hexoside isomer 2                    | C21H22O10  | 20,39 | 435,12913            |                      | 399,1060   | 339,0866   | 315,0868   | 285,0761   | 195,0290   |

|                 |                                               |           |       |           |           |          |          |          |          |          |
|-----------------|-----------------------------------------------|-----------|-------|-----------|-----------|----------|----------|----------|----------|----------|
| 31              | Quercetin-O-hexosylhexoside                   | C27H30O17 | 20,70 |           | 625,14048 | 301,0356 | 300,0276 | 299,0198 | 271,0249 | 255,0296 |
| 32              | Naringenin-C-hexoside isomer 3                | C21H22O10 | 20,74 | 435,12913 |           | 417,1191 | 369,0981 | 339,0870 | 219,0285 | 195,0289 |
| 33              | Quercetin-O-dirhamnosylhexoside               | C33H40O20 | 21,28 |           | 755,20347 | 301,0355 | 300,0276 | 299,0190 | 271,0248 | 255,0296 |
| 34              | Hexahydroxy(iso)flavone-O-hexoside            | C21H20O13 | 21,47 |           | 479,08257 | 316,0228 | 287,0187 | 271,0247 |          |          |
| 35              | Hexahydroxy(iso)flavone-O-rhamnosylhexoside   | C27H30O17 | 21,56 |           | 625,14048 | 317,0299 | 316,0225 | 315,0175 | 287,0201 | 271,0250 |
| 36 <sup>1</sup> | Vitexin (Apigenin-8-C-glucoside)              | C21H20O10 | 21,89 | 433,11348 |           | 415,1024 | 397,0918 | 367,0809 | 313,0705 | 283,0600 |
| 37              | Kaempferol-O-dirhamnosylhexoside              | C33H40O19 | 22,59 |           | 739,20856 | 285,0406 | 284,0328 | 283,0243 | 255,0297 | 227,0343 |
| 38              | Isovitexin (Apigenin-6-C-glucoside)           | C21H20O10 | 22,78 | 433,11348 |           | 415,1016 | 397,0918 | 337,0706 | 313,0705 | 283,0601 |
| 39 <sup>1</sup> | Naringin (Naringenin-7-O-neohesperidoside)    | C27H32O14 | 23,45 |           | 579,17139 | 459,1155 | 271,0613 | 151,0022 | 119,0487 |          |
| 40 <sup>1</sup> | Rutin (Quercetin-3-O-rutinoside)              | C27H30O16 | 23,53 | 611,16122 |           | 465,1033 | 303,0495 | 129,0546 | 85,0288  | 71,0497  |
| 41              | Quercetin-O-pentoside                         | C20H18O11 | 23,79 |           | 433,07709 | 301,0346 | 300,0279 | 271,0242 | 255,0299 | 151,0026 |
| 42              | Astragalin (Kaempferol-3-O-glucoside)         | C21H20O11 | 25,29 |           | 447,09274 | 300,0275 | 285,0405 | 284,0328 | 271,0250 | 255,0297 |
| 43              | Kaempferol-3-O-rutinoside (Nicotiflorin)      | C27H30O15 | 25,41 |           | 593,15065 | 327,0512 | 285,0406 | 284,0328 | 255,0296 | 227,0343 |
| 44 <sup>1</sup> | Eriodictyol (3',4',5,7-Tetrahydroxyflavanone) | C15H12O6  | 25,50 |           | 287,05556 | 151,0023 | 135,0440 | 125,0227 | 107,0123 |          |
| 45              | Tetrahydroxy(iso)flavone-O-rhamnosylhexoside  | C28H32O16 | 25,76 |           | 623,16122 | 315,0514 | 314,0432 | 300,0277 | 299,0198 | 271,0248 |
| 46              | Abscisic acid                                 | C15H20O4  | 25,88 |           | 263,12834 | 219,1385 | 204,1149 | 201,1276 | 152,0830 | 151,0753 |
| 47 <sup>1</sup> | Quercetin (3,3',4',5,7-Pentahydroxyflavone)   | C15H10O7  | 27,57 |           | 301,03483 | 273,0411 | 178,9976 | 151,0024 | 121,0281 | 107,0124 |
| 48 <sup>1</sup> | Naringenin (4',5,7-Trihydroxyflavanone)       | C15H12O5  | 27,80 |           | 271,06069 | 177,0179 | 165,0188 | 151,0025 | 119,0487 | 107,0123 |
| 49 <sup>1</sup> | Luteolin (3',4',5,7-Tetrahydroxyflavone)      | C15H10O6  | 28,44 |           | 285,03991 | 175,0391 | 151,0025 | 149,0237 | 133,0283 |          |
| 50 <sup>1</sup> | Kaempferol (3,4',5,7-Tetrahydroxyflavone)     | C15H10O6  | 29,93 |           | 285,03991 | 257,0468 | 229,0502 | 213,0555 | 151,0021 |          |

Table S2. Chemical composition in the ethyl acetate (HAE) of leaves

| No.             | Name                                              | Formula   | Rt    | [M + H] <sup>+</sup> | [M - H] <sup>-</sup> | Fragment 1 | Fragment 2 | Fragment 3 | Fragment 4 | Fragment 5 |
|-----------------|---------------------------------------------------|-----------|-------|----------------------|----------------------|------------|------------|------------|------------|------------|
| 1               | Protocatechuic acid (3,4-Dihydroxybenzoic acid)   | C7H6O4    | 5,56  |                      | 153,01879            | 109,0280   | 108,0203   | 91,0176    | 81,0330    |            |
| 2               | Neochlorogenic acid (5-O-Caffeoylquinic acid)     | C16H18O9  | 10,29 | 355,10291            |                      | 163,0389   | 145,0285   | 135,0442   | 117,0337   | 89,0390    |
| 3               | Hydroxybenzaldehyde                               | C7H6O2    | 13,07 | 123,04461            |                      | 105,0451   | 95,0496    | 81,0702    | 67,0548    | 53,0394    |
| 4               | 3-O-(4-Coumaroyl)quinic acid                      | C16H18O8  | 13,31 |                      | 337,09235            | 191,0553   | 173,0447   | 163,0388   | 119,0487   |            |
| 5               | Esculetin (6,7-Dihydroxycoumarin)                 | C9H6O4    | 14,75 | 179,03444            |                      | 151,0390   | 133,0284   | 123,0442   | 105,0341   |            |
| 6 <sup>1</sup>  | Chlorogenic acid (3-O-Caffeoylquinic acid)        | C16H18O9  | 14,90 | 355,10291            |                      | 163,0389   | 145,0285   | 135,0442   | 117,0336   | 89,0389    |
| 7               | Caffeic acid                                      | C9H8O4    | 15,17 |                      | 179,03444            | 135,0439   | 107,0489   |            |            |            |
| 8               | Procyanidin B                                     | C30H26O12 | 15,69 |                      | 577,13460            | 451,1028   | 425,0863   | 407,0771   | 289,0720   | 125,0228   |
| 9               | Chryptochlorogenic acid (4-O-Caffeoylquinic acid) | C16H18O9  | 16,17 | 355,10291            |                      | 163,0390   | 145,0285   | 135,0443   | 117,0338   | 89,0389    |
| 10              | 2-Oxindole                                        | C8H7NO    | 17,22 | 134,06059            |                      | 106,0655   | 105,0338   | 79,0548    |            |            |
| 11              | Procyanidin C                                     | C45H38O18 | 17,31 |                      | 865,19790            | 695,1354   | 577,1348   | 407,0773   | 289,0711   | 125,0229   |
| 12              | 5-O-(4-Coumaroyl)quinic acid                      | C16H18O8  | 17,43 |                      | 337,09235            | 191,0552   | 173,0436   | 163,0387   | 119,0488   | 93,0330    |
| 13 <sup>1</sup> | Epicatechin                                       | C15H14O6  | 17,59 |                      | 289,07121            | 245,0818   | 205,0502   | 203,0707   | 125,0229   | 109,0280   |
| 14              | Antiarol (3,4,5-Trimethoxyphenol)                 | C9H12O4   | 18,46 | 185,08139            |                      | 170,0575   | 154,0624   | 153,0546   | 139,0391   | 125,0598   |
| 15 <sup>1</sup> | 4-Coumaric acid                                   | C9H8O3    | 18,49 |                      | 163,03952            | 119,0487   | 93,0331    |            |            |            |
| 16              | Tuberonic acid or 12-Hydroxyjasmonic acid         | C12H18O4  | 18,72 |                      | 225,11269            | 181,1227   | 165,0910   | 147,0802   | 135,0802   | 59,0122    |
| 17 <sup>1</sup> | Taxifolin (Dihydroquercetin)                      | C15H12O7  | 19,88 |                      | 303,05048            | 285,0406   | 175,0390   | 153,0179   | 125,0229   | 57,0329    |
| 18              | Quercetin-O-rhamnosyldihexoside                   | C33H40O21 | 20,23 |                      | 771,19839            | 301,0357   | 300,0277   | 299,0197   | 271,0249   | 255,0296   |
| 19              | Quercetin-O-hexosylhexoside                       | C27H30O17 | 20,65 |                      | 625,14048            | 301,0353   | 300,0277   | 299,0213   | 271,0247   | 255,0295   |
| 20              | Quercetin-O-dirhamnosylhexoside                   | C33H40O20 | 21,24 |                      | 755,20347            | 301,0356   | 300,0276   | 299,0195   | 271,0248   | 255,0296   |
| 21              | Hexahydroxy(iso)flavone-O-rhamnosylhexoside       | C27H30O17 | 21,51 |                      | 625,14048            | 317,0310   | 316,0225   | 287,0191   | 271,0252   |            |
| 22 <sup>1</sup> | Vitexin (Apigenin-8-C-glucoside)                  | C21H20O10 | 21,86 | 433,11348            |                      | 415,1015   | 397,0919   | 367,0808   | 313,0705   | 283,0598   |
| 23              | Kaempferol-O-dirhamnosylhexoside                  | C33H40O19 | 22,56 |                      | 739,20856            | 285,0406   | 284,0328   | 283,0255   | 255,0297   | 227,0344   |
| 24              | Isovitexin (Apigenin-6-C-glucoside)               | C21H20O10 | 22,77 | 433,11348            |                      | 415,1008   | 397,0918   | 337,0706   | 313,0706   | 283,0599   |
| 25 <sup>1</sup> | Rutin (Quercetin-3-O-rutinoside)                  | C27H30O16 | 23,55 | 611,16122            |                      | 465,1025   | 303,0498   | 129,0549   | 85,0289    | 71,0497    |
| 26              | Quercetin-O-pentoside                             | C20H18O11 | 23,77 |                      | 433,07709            | 301,0349   | 300,0277   | 271,0246   | 255,0304   | 151,0029   |
| 27              | Astragalin (Kaempferol-3-O-glucoside)             | C21H20O11 | 25,26 |                      | 447,09274            | 300,0278   | 285,0407   | 284,0329   | 271,0249   | 255,0297   |
| 28              | Kaempferol-3-O-rutinoside (Nicotiflorin)          | C27H30O15 | 25,38 |                      | 593,15065            | 327,0512   | 285,0405   | 284,0327   | 255,0296   | 227,0343   |
| 29 <sup>1</sup> | Eriodictyol (3',4',5,7-Tetrahydroxyflavanone)     | C15H12O6  | 25,46 |                      | 287,05556            | 269,0462   | 151,0024   | 135,0439   | 125,0230   | 107,0123   |
| 30              | Tetrahydroxy(iso)flavone-O-rhamnosylhexoside      | C28H32O16 | 25,74 |                      | 623,16122            | 315,0515   | 314,0430   | 300,0270   | 299,0212   | 271,0238   |

|                 |                                                        |          |       |  |           |          |          |          |          |          |
|-----------------|--------------------------------------------------------|----------|-------|--|-----------|----------|----------|----------|----------|----------|
| 31              | Absciscic acid                                         | C15H20O4 | 25,86 |  | 263,12834 | 219,1383 | 204,1150 | 201,1270 | 152,0827 | 151,0748 |
| 32 <sup>1</sup> | Quercetin (3,3',4',5,7-Pentahydroxyflavone)            | C15H10O7 | 27,56 |  | 301,03483 | 273,0409 | 178,9976 | 151,0024 | 121,0280 | 107,0124 |
| 33 <sup>1</sup> | Naringenin (4',5,7-Trihydroxyflavanone)                | C15H12O5 | 27,78 |  | 271,06069 | 177,0179 | 165,0188 | 151,0024 | 119,0487 | 107,0124 |
| 34 <sup>1</sup> | Luteolin (3',4',5,7-Tetrahydroxyflavone)               | C15H10O6 | 28,43 |  | 285,03991 | 175,0391 | 151,0025 | 149,0235 | 133,0281 |          |
| 35 <sup>1</sup> | Kaempferol (3,4',5,7-Tetrahydroxyflavone)              | C15H10O6 | 29,92 |  | 285,03991 | 257,0449 | 229,0501 | 213,0552 | 151,0026 |          |
| 36 <sup>1</sup> | Apigenin (4',5,7-Trihydroxyflavone)                    | C15H10O5 | 30,27 |  | 269,04500 | 225,0553 | 201,0551 | 151,0022 | 149,0231 | 117,0330 |
| 37 <sup>1</sup> | Isorhamnetin (3'-Methoxy-3,4',5,7-tetrahydroxyflavone) | C16H12O7 | 30,40 |  | 315,05048 | 300,0275 | 283,0273 | 164,0104 | 151,0025 | 107,0124 |
| 38              | Methoxy-trihydroxy(iso)flavone                         | C16H12O6 | 30,48 |  | 299,05556 | 284,0329 | 256,0375 |          |          |          |
| 39              | Pinocembrin (5,7-Dihydroxyflavanone)                   | C15H12O4 | 32,77 |  | 255,06573 | 213,0553 | 151,0024 | 145,0646 | 107,0126 | 65,0019  |

Table S3. Chemical composition in the methanol (HAE) of leaves

| No.             | Name                                              | Formula    | Rt    | [M + H] <sup>+</sup> | [M - H] <sup>-</sup> | Fragment 1 | Fragment 2 | Fragment 3 | Fragment 4 | Fragment 5 |
|-----------------|---------------------------------------------------|------------|-------|----------------------|----------------------|------------|------------|------------|------------|------------|
| 1               | Protocatechuic acid (3,4-Dihydroxybenzoic acid)   | C7H6O4     | 5,53  |                      | 153,01879            | 109,0280   | 108,0202   | 91,0175    | 81,0330    |            |
| 2               | Neochlorogenic acid (5-O-Caffeoylquinic acid)     | C16H18O9   | 10,28 | 355,10291            |                      | 163,0390   | 145,0286   | 135,0443   | 117,0338   | 89,0390    |
| 3               | Hydroxybenzaldehyde                               | C7H6O2     | 13,08 | 123,04461            |                      | 105,0453   | 95,0497    | 81,0704    | 67,0549    | 53,0394    |
| 4               | 3-O-(4-Coumaroyl)quinic acid                      | C16H18O8   | 13,33 |                      | 337,09235            | 191,0555   | 173,0440   | 163,0389   | 119,0488   | 93,0330    |
| 5 <sup>1</sup>  | Catechin                                          | C15H14O6   | 14,02 |                      | 289,07121            | 245,0817   | 205,0501   | 203,0708   | 125,0230   | 109,0281   |
| 6               | Esculetin (6,7-Dihydroxycoumarin)                 | C9H6O4     | 14,74 | 179,03444            |                      | 151,0392   | 133,0286   | 123,0443   | 105,0339   | 89,0392    |
| 7 <sup>1</sup>  | Chlorogenic acid (3-O-Caffeoylquinic acid)        | C16H18O9   | 14,88 | 355,10291            |                      | 163,0390   | 145,0286   | 135,0443   | 117,0338   | 89,0390    |
| 8               | 3-O-Feruloylquinic acid                           | C17H20O9   | 15,13 |                      | 367,10291            | 193,0499   | 191,0539   | 173,0445   | 134,0362   |            |
| 9               | Caffeic acid                                      | C9H8O4     | 15,17 |                      | 179,03444            | 135,0439   | 107,0488   |            |            |            |
| 10              | Procyanidin B                                     | C30H26O12  | 15,69 |                      | 577,13460            | 451,1036   | 425,0882   | 407,0772   | 289,0720   | 125,0230   |
| 11              | Cinchonain II isomer 1                            | C39H32O15  | 16,08 |                      | 739,16630            | 587,1197   | 339,0512   | 289,0723   | 177,0184   |            |
| 12              | Chryptochlorogenic acid (4-O-Caffeoylquinic acid) | C16H18O9   | 16,15 | 355,10291            |                      | 163,0390   | 145,0285   | 135,0442   | 117,0338   | 89,0390    |
| 13              | Cinchonain II isomer 2                            | C39H32O15  | 17,04 |                      | 739,16630            | 587,1196   | 339,0508   | 289,0721   | 177,0183   |            |
| 14              | 2-Oxindole                                        | C8H7NO     | 17,21 | 134,06059            |                      | 106,0655   | 105,0339   | 79,0548    |            |            |
| 15              | Procyanidin C                                     | C45H38O18  | 17,26 |                      | 865,19799            | 695,1426   | 577,1357   | 407,0772   | 289,0721   | 125,0230   |
| 16              | 5-O-(4-Coumaroyl)quinic acid                      | C16H18O8   | 17,44 |                      | 337,09235            | 191,0554   | 173,0439   | 163,0388   | 119,0486   | 93,0331    |
| 17 <sup>1</sup> | Epicatechin                                       | C15H14O6   | 17,58 |                      | 289,07121            | 245,0817   | 205,0502   | 203,0708   | 125,0229   | 109,0280   |
| 18              | Cinchonain II isomer 3                            | C39H32O15  | 17,87 |                      | 739,16630            | 587,1212   | 339,0509   | 289,0723   | 177,0182   |            |
| 19              | 4-O-(4-Coumaroyl)quinic acid                      | C16H18O8   | 18,07 |                      | 337,09235            | 191,0561   | 173,0444   | 163,0389   | 119,0487   | 93,0330    |
| 20              | Cinchonain II isomer 4                            | C39H32O15  | 18,07 |                      | 739,16630            | 587,1216   | 339,0510   | 289,0718   | 177,0182   |            |
| 21              | Antiarol (3,4,5-Trimethoxyphenol)                 | C9H12O4    | 18,46 | 185,08139            |                      | 170,0576   | 154,0625   | 153,0547   | 139,0390   | 125,0599   |
| 22              | 5-O-Feruloylquinic acid                           | C17H20O9   | 18,48 |                      | 367,10291            | 193,0506   | 191,0554   | 173,0443   | 134,0363   | 93,0332    |
| 23 <sup>1</sup> | 4-Coumaric acid                                   | C9H8O3     | 18,49 |                      | 163,03952            | 119,0488   | 93,0332    |            |            |            |
| 24              | Tuberonic acid or 12-Hydroxyjasmonic acid         | C12H18O4   | 18,73 |                      | 225,11269            | 181,1221   | 165,0908   | 147,0804   | 135,0803   | 59,0123    |
| 25              | 4-O-Feruloylquinic acid                           | C17H20O9   | 18,97 |                      | 367,10291            | 193,0499   | 191,0553   | 173,0444   | 134,0359   | 93,0330    |
| 26              | Riboflavin                                        | C17H20N4O6 | 19,06 | 377,14611            |                      | 359,1353   | 243,0877   | 172,0868   | 99,0445    | 69,0342    |
| 27              | Cinchonain I isomer 1                             | C24H20O9   | 19,30 |                      | 451,10291            | 341,0666   | 289,0720   | 231,0294   | 217,0137   | 189,0185   |
| 28              | Naringenin-C-hexoside isomer 1                    | C21H22O10  | 19,80 | 435,12913            |                      | 399,1041   | 339,0867   | 315,0847   | 285,0764   | 195,0291   |

|                 |                                                        |           |       |           |           |          |          |          |          |          |
|-----------------|--------------------------------------------------------|-----------|-------|-----------|-----------|----------|----------|----------|----------|----------|
| 29 <sup>1</sup> | Taxifolin (Dihydroquercetin)                           | C15H12O7  | 19,88 |           | 303,05048 | 285,0407 | 175,0388 | 153,0181 | 125,0229 | 57,0332  |
| 30              | Quercetin-O-rhamnosyldihexoside                        | C33H40O21 | 20,24 |           | 771,19839 | 301,0355 | 300,0277 | 299,0206 | 271,0248 | 255,0298 |
| 31              | Naringenin-C-hexoside isomer 2                         | C21H22O10 | 20,36 | 435,12913 |           | 399,1061 | 339,0869 | 315,0855 | 285,0756 | 195,0290 |
| 32              | Quercetin-O-hexosylhexoside                            | C27H30O17 | 20,66 |           | 625,14048 | 301,0356 | 300,0277 | 299,0209 | 271,0249 | 255,0297 |
| 33              | Naringenin-C-hexoside isomer 3                         | C21H22O10 | 20,71 | 435,12913 |           | 417,1189 | 369,0970 | 339,0866 | 219,0292 | 195,0290 |
| 34              | Quercetin-O-dirhamnosylhexoside                        | C33H40O20 | 21,26 |           | 755,20347 | 301,0353 | 300,0277 | 299,0201 | 271,0249 | 255,0298 |
| 35              | Hexahydroxy(iso)flavone-O-hexoside                     | C21H20O13 | 21,44 |           | 479,08257 | 317,0302 | 316,0226 | 287,0197 | 271,0253 |          |
| 36              | Hexahydroxy(iso)flavone-O-rhamnosylhexoside            | C27H30O17 | 21,53 |           | 625,14048 | 317,0304 | 316,0224 | 315,0159 | 287,0200 | 271,0249 |
| 37              | Cinchonain I isomer 2                                  | C24H20O9  | 21,70 |           | 451,10291 | 341,0666 | 289,0723 | 231,0295 | 217,0137 | 189,0186 |
| 38              | Vitexin (Apigenin-8-C-glucoside)                       | C21H20O10 | 21,85 | 433,11348 |           | 415,1024 | 397,0920 | 367,0816 | 313,0707 | 283,0601 |
| 39 <sup>1</sup> | Kaempferol-O-dirhamnosylhexoside                       | C33H40O19 | 22,58 |           | 739,20856 | 285,0406 | 284,0328 | 283,0250 | 255,0297 | 227,0345 |
| 40              | Cinchonain I isomer 3                                  | C24H20O9  | 22,71 |           | 451,10291 | 341,0666 | 289,0705 | 231,0293 | 217,0137 | 189,0186 |
| 41              | Isovitexin (Apigenin-6-C-glucoside)                    | C21H20O10 | 22,77 | 433,11348 |           | 415,1021 | 397,0919 | 337,0707 | 313,0706 | 283,0601 |
| 42 <sup>1</sup> | Naringin (Naringenin-7-O-neohesperidoside)             | C27H32O14 | 23,42 |           | 579,17139 | 459,1144 | 271,0610 | 151,0024 | 119,0492 |          |
| 43 <sup>1</sup> | Isoquercitrin (Quercetin-3-O-glucoside)                | C21H20O12 | 23,43 |           | 463,08765 | 301,0357 | 300,0277 | 271,0249 | 255,0300 | 151,0024 |
| 44 <sup>1</sup> | Rutin (Quercetin-3-O-rutinoside)                       | C27H30O16 | 23,52 | 611,16122 |           | 465,1016 | 303,0499 | 129,0549 | 85,0289  | 71,0497  |
| 45              | Quercetin-O-pentoside                                  | C20H18O11 | 23,79 |           | 433,07709 | 301,0356 | 300,0279 | 271,0246 | 255,0296 | 151,0032 |
| 46              | Astragalin (Kaempferol-3-O-glucoside)                  | C21H20O11 | 25,28 |           | 447,09274 | 300,0276 | 285,0407 | 284,0329 | 271,0245 | 255,0298 |
| 47              | Kaempferol-3-O-rutinoside (Nicotiflorin)               | C27H30O15 | 25,39 |           | 593,15065 | 327,0519 | 285,0406 | 284,0328 | 255,0297 | 227,0344 |
| 48              | Cinchonain I isomer 4                                  | C24H20O9  | 25,44 |           | 451,10291 | 341,0667 | 289,0717 | 231,0294 | 217,0137 | 189,0185 |
| 49 <sup>1</sup> | Eriodictyol (3',4',5,7-Tetrahydroxyflavanone)          | C15H12O6  | 25,47 |           | 287,05556 | 151,0024 | 135,0439 | 125,0230 | 107,0124 |          |
| 50 <sup>1</sup> | Isorhamnetin-3-O-glucoside                             | C22H22O12 | 25,50 |           | 477,10330 | 314,0434 | 299,0187 | 285,0404 | 271,0244 | 243,0301 |
| 51              | Tetrahydroxy(iso)flavone-O-rhamnosylhexoside           | C28H32O16 | 25,75 |           | 623,16122 | 315,0514 | 314,0437 | 300,0280 | 299,0199 | 271,0251 |
| 52              | Abscisic acid                                          | C15H20O4  | 25,87 |           | 263,12834 | 219,1385 | 204,1151 | 201,1278 | 152,0831 | 151,0752 |
| 53 <sup>1</sup> | Quercetin (3,3',4',5,7-Pentahydroxyflavone)            | C15H10O7  | 27,56 |           | 301,03483 | 273,0402 | 178,9976 | 151,0024 | 121,0281 | 107,0125 |
| 54 <sup>1</sup> | Naringenin (4',5,7-Trihydroxyflavanone)                | C15H12O5  | 27,79 |           | 271,06069 | 177,0182 | 165,0182 | 151,0025 | 119,0488 | 107,0125 |
| 55 <sup>1</sup> | Luteolin (3',4',5,7-Tetrahydroxyflavone)               | C15H10O6  | 28,43 |           | 285,03991 | 217,0493 | 175,0389 | 151,0025 | 149,0232 | 133,0282 |
| 56 <sup>1</sup> | Kaempferol (3,4',5,7-Tetrahydroxyflavone)              | C15H10O6  | 29,92 |           | 285,03991 | 257,0445 | 229,0502 | 213,0549 | 169,0647 | 151,0021 |
| 57 <sup>1</sup> | Apigenin (4',5,7-Trihydroxyflavone)                    | C15H10O5  | 30,29 |           | 269,04500 | 225,0546 | 201,0551 | 151,0025 | 149,0232 | 117,0331 |
| 58 <sup>1</sup> | Isorhamnetin (3'-Methoxy-3,4',5,7-tetrahydroxyflavone) | C16H12O7  | 30,42 |           | 315,05048 | 300,0279 | 283,0273 | 164,0104 | 151,0026 | 107,0124 |
| 59              | Methoxy-trihydroxy(iso)flavone                         | C16H12O6  | 30,49 |           | 299,05556 | 284,0321 | 256,0366 |          |          |          |
| 60              | Pinocembrin (5,7-Dihydroxyflavanone)                   | C15H12O4  | 32,77 |           | 255,06573 | 213,0548 | 151,0032 | 145,0646 | 107,0126 |          |

Table S4. Chemical composition in the infusion of bark

| No.             | Name                                              | Formula    | Rt    | [M + H] <sup>+</sup> | [M - H] <sup>-</sup> | Fragment 1 | Fragment 2 | Fragment 3 | Fragment 4 | Fragment 5 |
|-----------------|---------------------------------------------------|------------|-------|----------------------|----------------------|------------|------------|------------|------------|------------|
| 1 <sup>1</sup>  | Gallic acid (3,4,5-Trihydroxybenzoic acid)        | C7H6O5     | 2,58  |                      | 169,01370            | 125,0230   | 97,0280    | 81,0331    | 69,0330    |            |
| 2               | Protocatechuic acid (3,4-Dihydroxybenzoic acid)   | C7H6O4     | 5,48  |                      | 153,01879            | 109,0280   | 108,0203   | 91,0174    | 81,0331    |            |
| 3               | Pantothenic acid                                  | C9H17NO5   | 6,10  | 220,11850            |                      | 202,1077   | 184,0972   | 174,1131   | 116,0347   | 90,0555    |
| 4               | Neochlorogenic acid (5-O-Caffeoylquinic acid)     | C16H18O9   | 10,12 | 355,10291            |                      | 163,0391   | 145,0286   | 135,0443   | 117,0339   | 89,0391    |
| 5               | 3-O-(4-Coumaroyl)quinic acid                      | C16H18O8   | 13,29 |                      | 337,09235            | 191,0554   | 173,0446   | 163,0389   | 119,0488   | 93,0329    |
| 6 <sup>1</sup>  | Catechin                                          | C15H14O6   | 14,01 |                      | 289,07121            | 245,0819   | 205,0503   | 203,0709   | 125,0231   | 109,0281   |
| 7               | Esculetin (6,7-Dihydroxycoumarin)                 | C9H6O4     | 14,72 | 179,03444            |                      | 151,0390   | 133,0286   | 123,0444   | 105,0341   |            |
| 8 <sup>1</sup>  | Chlorogenic acid (3-O-Caffeoylquinic acid)        | C16H18O9   | 14,86 | 355,10291            |                      | 163,0391   | 145,0286   | 135,0443   | 117,0339   | 89,0390    |
| 9               | 3-O-Feruloylquinic acid                           | C17H20O9   | 15,10 |                      | 367,10291            | 193,0500   | 191,0558   | 173,0424   | 134,0361   |            |
| 10              | Caffeic acid                                      | C9H8O4     | 15,18 |                      | 179,03444            | 135,0439   | 107,0488   |            |            |            |
| 11              | Procyanidin B                                     | C30H26O12  | 15,67 |                      | 577,13460            | 451,1034   | 425,0881   | 407,0774   | 289,0722   | 125,0230   |
| 12              | Chryptochlorogenic acid (4-O-Caffeoylquinic acid) | C16H18O9   | 16,12 | 355,10291            |                      | 163,0391   | 145,0286   | 135,0443   | 117,0339   | 89,0391    |
| 13              | Cinchonain II isomer 1                            | C39H32O15  | 17,03 |                      | 739,16630            | 587,1199   | 339,0523   | 289,0711   | 177,0183   |            |
| 14              | 2-Oxindole                                        | C8H7NO     | 17,22 | 134,06059            |                      | 106,0656   | 105,0341   | 79,0549    |            |            |
| 15              | Procyanidin C                                     | C45H38O18  | 17,31 |                      | 865,19799            | 695,1422   | 577,1364   | 407,0772   | 289,0721   | 125,0230   |
| 16              | 5-O-(4-Coumaroyl)quinic acid                      | C16H18O8   | 17,43 |                      | 337,09235            | 191,0555   | 173,0444   | 163,0388   | 119,0487   | 93,0331    |
| 17 <sup>1</sup> | Epicatechin                                       | C15H14O6   | 17,58 |                      | 289,07121            | 245,0818   | 205,0503   | 203,0708   | 125,0230   | 109,0281   |
| 18              | Cinchonain II isomer 2                            | C39H32O15  | 17,89 |                      | 739,16630            | 587,1217   | 339,0515   | 289,0719   | 177,0181   |            |
| 19              | 4-O-(4-Coumaroyl)quinic acid                      | C16H18O8   | 18,07 |                      | 337,09235            | 191,0556   | 173,0445   | 163,0389   | 119,0488   | 93,0330    |
| 20              | Antiarol (3,4,5-Trimethoxyphenol)                 | C9H12O4    | 18,47 | 185,08139            |                      | 170,0574   | 154,0625   | 153,0547   | 139,0390   | 125,0599   |
| 21              | 5-O-Feruloylquinic acid                           | C17H20O9   | 18,48 |                      | 367,10291            | 193,0502   | 191,0554   | 173,0441   | 134,0357   | 93,0331    |
| 22 <sup>1</sup> | 4-Coumaric acid                                   | C9H8O3     | 18,51 |                      | 163,03952            | 119,0488   | 93,0331    |            |            |            |
| 23              | Tuberonic acid or 12-Hydroxyjasmonic acid         | C12H18O4   | 18,75 |                      | 225,11269            | 181,1221   | 165,0906   | 147,0803   | 135,0800   | 59,0123    |
| 24              | 4-O-Feruloylquinic acid                           | C17H20O9   | 18,98 |                      | 367,10291            | 193,0501   | 191,0553   | 173,0446   | 134,0360   | 93,0333    |
| 25              | Riboflavin                                        | C17H20N4O6 | 19,07 | 377,14611            |                      | 359,1358   | 243,0879   | 172,0870   | 99,0449    | 69,0343    |
| 26              | Naringenin-C-hexoside isomer 1                    | C21H22O10  | 19,81 | 435,12913            |                      | 399,1052   | 339,0870   | 315,0877   | 285,0760   | 195,0293   |
| 27 <sup>1</sup> | Taxifolin (Dihydroquercetin)                      | C15H12O7   | 19,89 |                      | 303,05048            | 285,0409   | 175,0387   | 153,0180   | 125,0230   | 57,0332    |

|                 |                                               |           |       |           |           |          |          |          |          |          |
|-----------------|-----------------------------------------------|-----------|-------|-----------|-----------|----------|----------|----------|----------|----------|
| 28              | Quercetin-O-rhamnosyldihexoside               | C33H40O21 | 20,25 |           | 771,19839 | 301,0356 | 300,0279 | 299,0204 | 271,0251 | 255,0299 |
| 29              | Naringenin-C-hexoside isomer 2                | C21H22O10 | 20,35 | 435,12913 |           | 399,1085 | 339,0870 | 315,0857 | 285,0757 | 195,0291 |
| 30              | Quercetin-O-hexosylhexoside                   | C27H30O17 | 20,67 |           | 625,14048 | 301,0353 | 300,0279 | 299,0204 | 271,0250 | 255,0299 |
| 31              | Naringenin-C-hexoside isomer 3                | C21H22O10 | 20,71 | 435,12913 |           | 417,1179 | 369,0976 | 339,0849 | 219,0288 | 195,0292 |
| 32              | Quercetin-O-dirhamnosylhexoside               | C33H40O20 | 21,26 |           | 755,20347 | 301,0352 | 300,0280 | 299,0201 | 271,0244 | 255,0298 |
| 33              | Hexahydroxy(iso)flavone-O-hexoside            | C21H20O13 | 21,44 |           | 479,08257 | 317,0327 | 316,0235 | 287,0195 | 271,0248 |          |
| 34              | Hexahydroxy(iso)flavone-O-rhamnosylhexoside   | C27H30O17 | 21,52 |           | 625,14048 | 317,0305 | 316,0227 | 315,0151 | 287,0201 | 271,0250 |
| 35 <sup>1</sup> | Vitexin (Apigenin-8-C-glucoside)              | C21H20O10 | 21,85 | 433,11348 |           | 415,1028 | 397,0921 | 367,0815 | 313,0708 | 283,0603 |
| 36              | Isovitexin (Apigenin-6-C-glucoside)           | C21H20O10 | 22,75 | 433,11348 |           | 415,1027 | 397,0920 | 337,0709 | 313,0707 | 283,0603 |
| 37              | Luteolin-7-O-glucoside (Cynaroside)           | C21H20O11 | 22,86 |           | 447,09274 | 327,0506 | 285,0409 | 284,0330 | 151,0026 | 133,0278 |
| 39 <sup>1</sup> | Isoquercitrin (Quercetin-3-O-glucoside)       | C21H20O12 | 23,44 |           | 463,08765 | 301,0358 | 300,0278 | 271,0251 | 255,0300 | 151,0024 |
| 38 <sup>1</sup> | Naringin (Naringenin-7-O-neohesperidoside)    | C27H32O14 | 23,45 |           | 579,17139 | 459,1178 | 271,0617 | 151,0024 | 119,0489 |          |
| 40              | Luteolin-7-O-rutinoside (Scolymoside)         | C27H30O15 | 23,50 |           | 593,15065 | 447,0928 | 285,0408 | 284,0331 | 151,0024 | 133,0283 |
| 41 <sup>1</sup> | Rutin (Quercetin-3-O-rutinoside)              | C27H30O16 | 23,52 | 611,16122 |           | 465,1032 | 303,0501 | 129,0550 | 85,0290  | 71,0498  |
| 42              | Kaempferol-3-O-rutinoside (Nicotiflorin)      | C27H30O15 | 25,38 |           | 593,15065 | 327,0506 | 285,0407 | 284,0329 | 255,0298 | 227,0342 |
| 43 <sup>1</sup> | Eriodictyol (3',4',5,7-Tetrahydroxyflavanone) | C15H12O6  | 25,45 |           | 287,05556 | 151,0024 | 135,0439 | 125,0234 | 107,0123 |          |
| 44 <sup>1</sup> | Isorhamnetin-3-O-glucoside                    | C22H22O12 | 25,45 |           | 477,10330 | 314,0443 | 299,0193 | 285,0399 | 271,0252 | 243,0293 |
| 45              | Tetrahydroxy(iso)flavone-O-rhamnosylhexoside  | C28H32O16 | 25,72 |           | 623,16122 | 315,0515 | 314,0435 | 300,0281 | 299,0206 | 271,0252 |
| 46              | Absciscic acid                                | C15H20O4  | 25,84 |           | 263,12834 | 219,1386 | 204,1150 | 201,1279 | 152,0830 | 151,0753 |
| 47              | Tetrahydroxyxanthone                          | C13H8O6   | 26,77 |           | 259,02427 | 231,0301 | 215,0346 | 203,0347 | 187,0389 |          |
| 48 <sup>1</sup> | Quercetin (3,3',4',5,7-Pentahydroxyflavone)   | C15H10O7  | 27,54 |           | 301,03483 | 273,0400 | 178,9976 | 151,0026 | 121,0281 | 107,0126 |
| 49 <sup>1</sup> | Naringenin (4',5,7-Trihydroxyflavanone)       | C15H12O5  | 27,77 |           | 271,06069 | 177,0190 | 165,0183 | 151,0025 | 119,0488 | 107,0124 |
| 50 <sup>1</sup> | Luteolin (3',4',5,7-Tetrahydroxyflavone)      | C15H10O6  | 28,42 |           | 285,03991 | 217,0504 | 175,0391 | 151,0025 | 149,0235 | 133,0282 |
| 51              | Methoxy-tetrahydroxy(iso)flavone              | C16H12O7  | 28,50 |           | 315,05048 | 300,0278 | 299,0212 |          |          |          |
| 52 <sup>1</sup> | Apigenin (4',5,7-Trihydroxyflavone)           | C15H10O5  | 30,26 |           | 269,04500 | 225,0553 | 201,0551 | 151,0025 | 149,0232 | 117,0331 |
| 53              | Methoxy-trihydroxy(iso)flavone isomer 1       | C16H12O6  | 30,48 |           | 299,05556 | 284,0329 | 256,0373 |          |          |          |
| 54              | Methoxy-trihydroxy(iso)flavone isomer 2       | C16H12O6  | 30,93 |           | 299,05556 | 284,0331 | 256,0376 | 255,0306 | 227,0343 |          |



Table S5. Chemical composition in the ethyl acetate (HAE) of bark

| No.             | Name                                              | Formula   | Rt    | [M + H] <sup>+</sup> | [M - H] <sup>-</sup> | Fragment 1 | Fragment 2 | Fragment 3 | Fragment 4 | Fragment 5 |
|-----------------|---------------------------------------------------|-----------|-------|----------------------|----------------------|------------|------------|------------|------------|------------|
| 1               | Protocatechuic acid (3,4-Dihydroxybenzoic acid)   | C7H6O4    | 5,53  |                      | 153,01879            | 109,0281   | 108,0203   | 91,0174    | 81,0333    |            |
| 2               | Neochlorogenic acid (5-O-Caffeoylquinic acid)     | C16H18O9  | 10,25 | 355,10291            |                      | 163,0391   | 145,0283   | 135,0443   | 117,0341   |            |
| 3               | 3-O-(4-Coumaroyl)quinic acid                      | C16H18O8  | 13,30 |                      | 337,09235            | 191,0534   | 173,0446   | 163,0391   | 119,0489   |            |
| 4 <sup>1</sup>  | Catechin                                          | C15H14O6  | 14,02 |                      | 289,07121            | 245,0812   | 205,0506   | 203,0715   | 125,0229   | 109,0283   |
| 5               | Esculetin (6,7-Dihydroxycoumarin)                 | C9H6O4    | 14,70 | 179,03444            |                      | 151,0393   | 133,0285   | 123,0444   | 105,0342   |            |
| 6 <sup>1</sup>  | Chlorogenic acid (3-O-Caffeoylquinic acid)        | C16H18O9  | 14,88 | 355,10291            |                      | 163,0391   | 145,0286   | 135,0443   | 117,0340   | 89,0390    |
| 7               | Caffeic acid                                      | C9H8O4    | 15,17 |                      | 179,03444            | 135,0440   | 107,0490   |            |            |            |
| 8               | Procyanidin B                                     | C30H26O12 | 15,68 |                      | 577,13460            | 451,1003   | 425,0888   | 407,0774   | 289,0720   | 125,0231   |
| 9               | Chryptochlorogenic acid (4-O-Caffeoylquinic acid) | C16H18O9  | 16,12 | 355,10291            |                      | 163,0392   | 145,0286   | 135,0444   | 117,0342   | 89,0391    |
| 10              | 2-Oxindole                                        | C8H7NO    | 17,19 | 134,06059            |                      | 106,0656   | 105,0341   | 79,0550    |            |            |
| 11              | Procyanidin C                                     | C45H38O18 | 17,29 |                      | 865,19799            | 695,1467   | 577,1313   | 407,0764   | 289,0728   | 125,0231   |
| 12 <sup>1</sup> | Epicatechin                                       | C15H14O6  | 17,56 |                      | 289,07121            | 245,0813   | 205,0497   | 203,0716   | 125,0232   | 109,0281   |
| 13              | Antiarol (3,4,5-Trimethoxyphenol)                 | C9H12O4   | 18,44 | 185,08139            |                      | 170,0574   | 154,0626   | 153,0548   | 139,0392   | 125,0600   |
| 14 <sup>1</sup> | 4-Coumaric acid                                   | C9H8O3    | 18,50 |                      | 163,03952            | 119,0489   | 93,0330    |            |            |            |
| 15              | Tuberonic acid or 12-Hydroxyjasmonic acid         | C12H18O4  | 18,74 |                      | 225,11269            | 181,1221   | 165,0909   | 147,0806   | 135,0800   | 59,0123    |
| 16              | Cinchonain I isomer 1                             | C24H20O9  | 19,29 |                      | 451,10291            | 341,0671   | 289,0720   | 231,0292   | 217,0143   | 189,0185   |
| 17 <sup>1</sup> | Taxifolin (Dihydroquercetin)                      | C15H12O7  | 19,88 |                      | 303,05048            | 285,0411   | 175,0389   | 153,0179   | 125,0230   | 57,0331    |
| 18              | Quercetin-O-rhamnosyldihexoside                   | C33H40O21 | 20,25 |                      | 771,19839            | 301,0367   | 300,0282   | 299,0204   | 271,0245   | 255,0300   |
| 19              | Quercetin-O-hexosylhexoside                       | C27H30O17 | 20,66 |                      | 625,14048            | 301,0353   | 300,0283   | 299,0204   | 271,0231   | 255,0292   |
| 20              | Hexahydroxy(iso)flavone-O-rhamnosylhexoside       | C27H30O17 | 21,53 |                      | 625,14048            | 317,0305   | 316,0225   | 315,0151   | 287,0201   | 271,0244   |
| 21              | Cinchonain I isomer 2                             | C24H20O9  | 21,67 |                      | 451,10291            | 341,0678   | 289,0720   | 231,0292   | 217,0137   | 189,0181   |
| 22 <sup>1</sup> | Vitexin (Apigenin-8-C-glucoside)                  | C21H20O10 | 21,86 | 433,11348            |                      | 415,1026   | 397,0923   | 367,0817   | 313,0710   | 283,0600   |
| 23              | Cinchonain I isomer 3                             | C24H20O9  | 22,71 |                      | 451,10291            | 341,0667   | 289,0720   | 231,0283   | 217,0132   | 189,0192   |
| 24              | Isovitexin (Apigenin-6-C-glucoside)               | C21H20O10 | 22,75 | 433,11348            |                      | 415,1043   | 397,0917   | 337,0714   | 313,0710   | 283,0601   |
| 25 <sup>1</sup> | Naringin (Naringenin-7-O-neohesperidoside)        | C27H32O14 | 23,45 |                      | 579,17139            | 459,1178   | 271,0610   | 151,0027   | 119,0486   |            |
| 26 <sup>1</sup> | Isoquercitrin (Quercetin-3-O-glucoside)           | C21H20O12 | 23,46 |                      | 463,08765            | 301,0357   | 300,0278   | 271,0250   | 255,0301   | 151,0024   |
| 27 <sup>1</sup> | Rutin (Quercetin-3-O-rutinoside)                  | C27H30O16 | 23,52 | 611,16122            |                      | 465,1047   | 303,0502   | 129,0550   | 85,0290    | 71,0498    |
| 28              | Kaempferol-3-O-rutinoside (Nicotiflorin)          | C27H30O15 | 25,38 |                      | 593,15065            | 327,0506   | 285,0409   | 284,0330   | 255,0305   | 227,0346   |
| 29              | Cinchonain I isomer 4                             | C24H20O9  | 25,40 |                      | 451,10291            | 341,0664   | 289,0720   | 231,0287   | 217,0132   | 189,0188   |
| 30 <sup>1</sup> | Eriodictyol (3',4',5,7-Tetrahydroxyflavanone)     | C15H12O6  | 25,45 |                      | 287,05556            | 151,0025   | 135,0440   | 125,0234   | 107,0126   |            |
| 31              | Tetrahydroxy(iso)flavone-O-rhamnosylhexoside      | C28H32O16 | 25,71 |                      | 623,16122            | 315,0513   | 314,0439   | 300,0279   | 299,0200   | 271,0267   |
| 32              | Abscisic acid                                     | C15H20O4  | 25,83 |                      | 263,12834            | 219,1383   | 204,1149   | 201,1282   | 152,0832   | 151,0750   |
| 33 <sup>1</sup> | Quercetin (3,3',4',5,7-Pentahydroxyflavone)       | C15H10O7  | 27,54 |                      | 301,03483            | 273,0412   | 178,9977   | 151,0025   | 121,0281   | 107,0125   |
| 34 <sup>1</sup> | Naringenin (4',5,7-Trihydroxyflavanone)           | C15H12O5  | 27,76 |                      | 271,06069            | 177,0184   | 165,0183   | 151,0025   | 119,0489   | 107,0125   |
| 35 <sup>1</sup> | Luteolin (3',4',5,7-Tetrahydroxyflavone)          | C15H10O6  | 28,41 |                      | 285,03991            | 217,0503   | 175,0388   | 151,0025   | 149,0233   | 133,0282   |
| 36 <sup>1</sup> | Apigenin (4',5,7-Trihydroxyflavone)               | C15H10O5  | 30,26 |                      | 269,04500            | 225,0568   | 201,0551   | 151,0028   | 149,0230   | 117,0331   |

|                 |                                                        |                                                |       |  |           |          |          |          |          |          |
|-----------------|--------------------------------------------------------|------------------------------------------------|-------|--|-----------|----------|----------|----------|----------|----------|
| 37 <sup>1</sup> | Isorhamnetin (3'-Methoxy-3,4',5,7-tetrahydroxyflavone) | C <sub>16</sub> H <sub>12</sub> O <sub>7</sub> | 30,39 |  | 315,05048 | 300,0283 | 283,0273 | 164,0108 | 151,0024 | 107,0125 |
| 38              | Methoxy-trihydroxy(iso)flavone                         | C <sub>16</sub> H <sub>12</sub> O <sub>6</sub> | 30,46 |  | 299,05556 | 284,0333 | 256,0377 |          |          |          |

Table S6. Chemical composition in the methanol (HAE) of bark

| No.             | Name                                              | Formula    | Rt    | [M + H] <sup>+</sup> | [M - H] <sup>-</sup> | Fragment 1 | Fragment 2 | Fragment 3 | Fragment 4 | Fragment 5 |
|-----------------|---------------------------------------------------|------------|-------|----------------------|----------------------|------------|------------|------------|------------|------------|
| 1 <sup>1</sup>  | Gallic acid (3,4,5-Trihydroxybenzoic acid)        | C7H6O5     | 2,64  |                      | 169,01370            | 125,0231   | 97,0281    | 81,0331    | 69,0332    |            |
| 2               | Protocatechuic acid (3,4-Dihydroxybenzoic acid)   | C7H6O4     | 5,51  |                      | 153,01879            | 109,0281   | 108,0203   | 91,0175    | 81,0331    |            |
| 3               | Pantothenic acid                                  | C9H17NO5   | 6,17  | 220,11850            |                      | 202,1079   | 184,0978   | 174,1131   | 116,0346   | 90,0556    |
| 4               | Neochlorogenic acid (5-O-Caffeoylquinic acid)     | C16H18O9   | 10,22 | 355,10291            |                      | 163,0391   | 145,0286   | 135,0444   | 117,0338   | 89,0390    |
| 5               | Prodelphinidin C                                  | C30H26O13  | 11,74 |                      | 593,12952            | 425,0895   | 407,0777   | 289,0730   | 177,0184   | 125,0230   |
| 6               | 3-O-(4-Coumaroyl)quinic acid                      | C16H18O8   | 13,29 |                      | 337,09235            | 191,0552   | 173,0444   | 163,0390   | 119,0489   | 93,0330    |
| 7 <sup>1</sup>  | Catechin                                          | C15H14O6   | 14,00 |                      | 289,07121            | 245,0818   | 205,0501   | 203,0708   | 125,0231   | 109,0281   |
| 8               | Esculetin (6,7-Dihydroxycoumarin)                 | C9H6O4     | 14,71 | 179,03444            |                      | 151,0394   | 133,0283   | 123,0444   | 105,0338   |            |
| 9 <sup>1</sup>  | Chlorogenic acid (3-O-Caffeoylquinic acid)        | C16H18O9   | 14,85 | 355,10291            |                      | 163,0391   | 145,0286   | 135,0443   | 117,0339   | 89,0392    |
| 10              | 3-O-Feruloylquinic acid                           | C17H20O9   | 15,08 |                      | 367,10291            | 193,0501   | 191,0558   | 173,0424   | 134,0361   |            |
| 11              | Caffeic acid                                      | C9H8O4     | 15,14 |                      | 179,03444            | 135,0439   | 107,0488   |            |            |            |
| 12              | Procyanidin B                                     | C30H26O12  | 15,64 |                      | 577,13460            | 451,1045   | 425,0883   | 407,0773   | 289,0722   | 125,0230   |
| 13              | Cinchonain II isomer 1                            | C39H32O15  | 16,04 |                      | 739,16630            | 587,1169   | 339,0519   | 289,0721   | 177,0186   |            |
| 14              | Chryptochlorogenic acid (4-O-Caffeoylquinic acid) | C16H18O9   | 16,11 | 355,10291            |                      | 163,0391   | 145,0286   | 135,0443   | 117,0339   | 89,0391    |
| 15              | Cinchonain II isomer 2                            | C39H32O15  | 16,99 |                      | 739,16630            | 587,1225   | 339,0506   | 289,0719   | 177,0183   |            |
| 16              | 2-Oxindole                                        | C8H7NO     | 17,22 | 134,06059            |                      | 106,0656   | 105,0340   | 79,0549    |            |            |
| 17              | Procyanidin C                                     | C45H38O18  | 17,27 |                      | 865,19799            | 695,1398   | 577,1353   | 407,0772   | 289,0722   | 125,0230   |
| 18              | 5-O-(4-Coumaroyl)quinic acid                      | C16H18O8   | 17,40 |                      | 337,09235            | 191,0555   | 173,0438   | 163,0386   | 119,0487   | 93,0330    |
| 19 <sup>1</sup> | Epicatechin                                       | C15H14O6   | 17,55 |                      | 289,07121            | 245,0818   | 205,0501   | 203,0709   | 125,0230   | 109,0281   |
| 20              | Cinchonain II isomer 3                            | C39H32O15  | 17,86 |                      | 739,16630            | 587,1193   | 339,0510   | 289,0723   | 177,0183   |            |
| 21              | Cinchonain II isomer 4                            | C39H32O15  | 18,04 |                      | 739,16630            | 587,1184   | 339,0513   | 289,0721   | 177,0183   |            |
| 22              | 4-O-(4-Coumaroyl)quinic acid                      | C16H18O8   | 18,06 |                      | 337,09235            | 191,0556   | 173,0446   | 163,0391   | 119,0489   | 93,0331    |
| 23              | Antiarol (3,4,5-Trimethoxyphenol)                 | C9H12O4    | 18,47 | 185,08139            |                      | 170,0576   | 154,0626   | 153,0548   | 139,0393   | 125,0600   |
| 24 <sup>1</sup> | 4-Coumaric acid                                   | C9H8O3     | 18,50 |                      | 163,03952            | 119,0488   | 93,0331    |            |            |            |
| 25              | Tuberonic acid or 12-Hydroxyjasmonic acid         | C12H18O4   | 18,74 |                      | 225,11269            | 181,1237   | 165,0908   | 147,0801   | 135,0802   | 59,0123    |
| 26              | 4-O-Feruloylquinic acid                           | C17H20O9   | 18,98 |                      | 367,10291            | 193,0495   | 191,0553   | 173,0445   | 134,0362   | 93,0329    |
| 27              | Riboflavin                                        | C17H20N4O6 | 19,07 | 377,14611            |                      | 359,1358   | 243,0880   | 172,0874   | 99,0447    | 69,0344    |
| 28              | Cinchonain I isomer 1                             | C24H20O9   | 19,30 |                      | 451,10291            | 341,0669   | 289,0718   | 231,0295   | 217,0138   | 189,0187   |
| 29              | Naringenin-C-hexoside isomer 1                    | C21H22O10  | 19,82 | 435,12913            |                      | 399,1089   | 339,0872   | 315,0885   | 285,0753   | 195,0292   |

|                 |                                               |           |       |           |           |          |          |          |          |          |
|-----------------|-----------------------------------------------|-----------|-------|-----------|-----------|----------|----------|----------|----------|----------|
| 30 <sup>1</sup> | Taxifolin (Dihydroquercetin)                  | C15H12O7  | 19,88 |           | 303,05048 | 285,0410 | 175,0389 | 153,0184 | 125,0230 | 57,0333  |
| 31              | Quercetin-O-rhamnosyldihexoside               | C33H40O21 | 20,26 |           | 771,19839 | 301,0357 | 300,0279 | 299,0204 | 271,0251 | 255,0299 |
| 32              | Naringenin-C-hexoside isomer 2                | C21H22O10 | 20,36 | 435,12913 |           | 399,1071 | 339,0875 | 315,0874 | 285,0755 | 195,0293 |
| 33              | Quercetin-O-hexosylhexoside                   | C27H30O17 | 20,66 |           | 625,14048 | 301,0358 | 300,0278 | 299,0203 | 271,0250 | 255,0299 |
| 34              | Naringenin-C-hexoside isomer 3                | C21H22O10 | 20,71 | 435,12913 |           | 417,1194 | 369,0955 | 339,0853 | 219,0292 | 195,0292 |
| 35              | Quercetin-O-dirhamnosylhexoside               | C33H40O20 | 21,27 |           | 755,20347 | 301,0352 | 300,0277 | 299,0201 | 271,0252 | 255,0301 |
| 36              | Hexahydroxy(iso)flavone-O-hexoside            | C21H20O13 | 21,45 |           | 479,08257 | 317,0301 | 316,0229 | 287,0201 | 271,0250 |          |
| 37              | Hexahydroxy(iso)flavone-O-rhamnosylhexoside   | C27H30O17 | 21,53 |           | 625,14048 | 317,0303 | 316,0226 | 315,0151 | 287,0202 | 271,0252 |
| 38              | Cinchonain I isomer 2                         | C24H20O9  | 21,70 |           | 451,10291 | 341,0669 | 289,0720 | 231,0290 | 217,0137 | 189,0185 |
| 39 <sup>1</sup> | Vitexin (Apigenin-8-C-glucoside)              | C21H20O10 | 21,86 | 433,11348 |           | 415,1028 | 397,0926 | 367,0822 | 313,0710 | 283,0604 |
| 40              | Tetrahydroxyxanthone isomer 1                 | C13H8O6   | 22,20 |           | 259,02427 | 231,0293 | 215,0343 | 203,0345 | 187,0382 |          |
| 41              | Cinchonain I isomer 3                         | C24H20O9  | 22,70 |           | 451,10291 | 341,0665 | 289,0720 | 231,0295 | 217,0137 | 189,0190 |
| 42              | Isovitexin (Apigenin-6-C-glucoside)           | C21H20O10 | 22,76 | 433,11348 |           | 415,1026 | 397,0922 | 337,0710 | 313,0709 | 283,0604 |
| 43              | Luteolin-7-O-glucoside (Cynaroside)           | C21H20O11 | 22,85 |           | 447,09274 | 327,0506 | 285,0408 | 284,0328 | 151,0026 | 133,0278 |
| 44 <sup>1</sup> | Naringin (Naringenin-7-O-neohesperidoside)    | C27H32O14 | 23,42 |           | 579,17139 | 459,1131 | 271,0615 | 151,0025 | 119,0489 |          |
| 45 <sup>1</sup> | Isoquercitrin (Quercetin-3-O-glucoside)       | C21H20O12 | 23,44 |           | 463,08765 | 301,0357 | 300,0279 | 271,0251 | 255,0299 | 151,0026 |
| 46              | Luteolin-7-O-rutinoside (Scolymoside)         | C27H30O15 | 23,51 |           | 593,15065 | 447,0932 | 285,0410 | 284,0331 | 151,0020 | 133,0273 |
| 47 <sup>1</sup> | Rutin (Quercetin-3-O-rutinoside)              | C27H30O16 | 23,52 | 611,16122 |           | 465,1029 | 303,0503 | 129,0551 | 85,0291  | 71,0499  |
| 48              | Kaempferol-3-O-rutinoside (Nicotiflorin)      | C27H30O15 | 25,38 |           | 593,15065 | 327,0521 | 285,0408 | 284,0330 | 255,0298 | 227,0345 |
| 49              | Cinchonain I isomer 4                         | C24H20O9  | 25,40 |           | 451,10291 | 341,0669 | 289,0723 | 231,0296 | 217,0138 | 189,0186 |
| 50 <sup>1</sup> | Eriodictyol (3',4',5,7-Tetrahydroxyflavanone) | C15H12O6  | 25,45 |           | 287,05556 | 151,0026 | 135,0440 | 125,0229 | 107,0125 |          |
| 51              | Tetrahydroxy(iso)flavone-O-rhamnosylhexoside  | C28H32O16 | 25,72 |           | 623,16122 | 315,0516 | 314,0427 | 300,0279 | 299,0205 | 271,0252 |
| 52              | Abscisic acid                                 | C15H20O4  | 25,84 |           | 263,12834 | 219,1386 | 204,1152 | 201,1282 | 152,0832 | 151,0752 |
| 53              | Tetrahydroxyxanthone isomer 2                 | C13H8O6   | 26,76 |           | 259,02427 | 231,0303 | 215,0342 | 203,0347 | 187,0397 |          |
| 54 <sup>1</sup> | Quercetin (3,3',4',5,7-Pentahydroxyflavone)   | C15H10O7  | 27,54 |           | 301,03483 | 273,0421 | 178,9979 | 151,0025 | 121,0282 | 107,0126 |
| 55 <sup>1</sup> | Naringenin (4',5,7-Trihydroxyflavanone)       | C15H12O5  | 27,76 |           | 271,06069 | 177,0183 | 165,0177 | 151,0026 | 119,0489 | 107,0125 |
| 56 <sup>1</sup> | Luteolin (3',4',5,7-Tetrahydroxyflavone)      | C15H10O6  | 28,40 |           | 285,03991 | 217,0503 | 175,0390 | 151,0025 | 149,0234 | 133,0282 |
| 57 <sup>1</sup> | Apigenin (4',5,7-Trihydroxyflavone)           | C15H10O5  | 30,26 |           | 269,04500 | 225,0536 | 201,0551 | 151,0031 | 149,0228 | 117,0334 |
| 58              | Methoxy-trihydroxy(iso)flavone                | C16H12O6  | 30,46 |           | 299,05556 | 284,0329 | 256,0374 |          |          |          |

RT: 0.00 - 70.00 SM: 7B

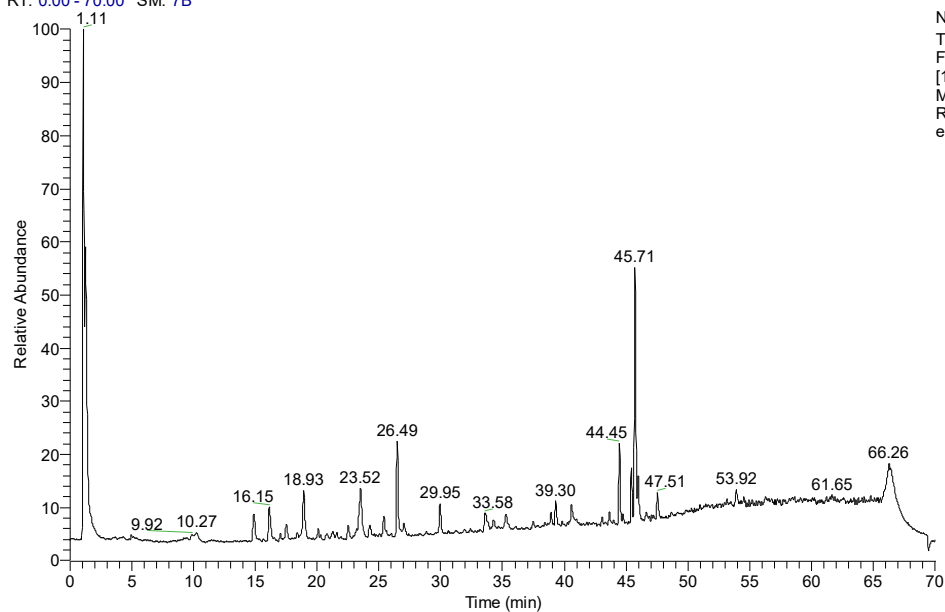

NL: 9.11E9  
TIC F: FTMS + p ESI  
Full ms  
[100.0000-1500.0000]  
MS  
Rhizophora\_racemosa\_l  
eaves\_infusion\_pos

(a)

RT: 0.00 - 70.00 SM: 7B

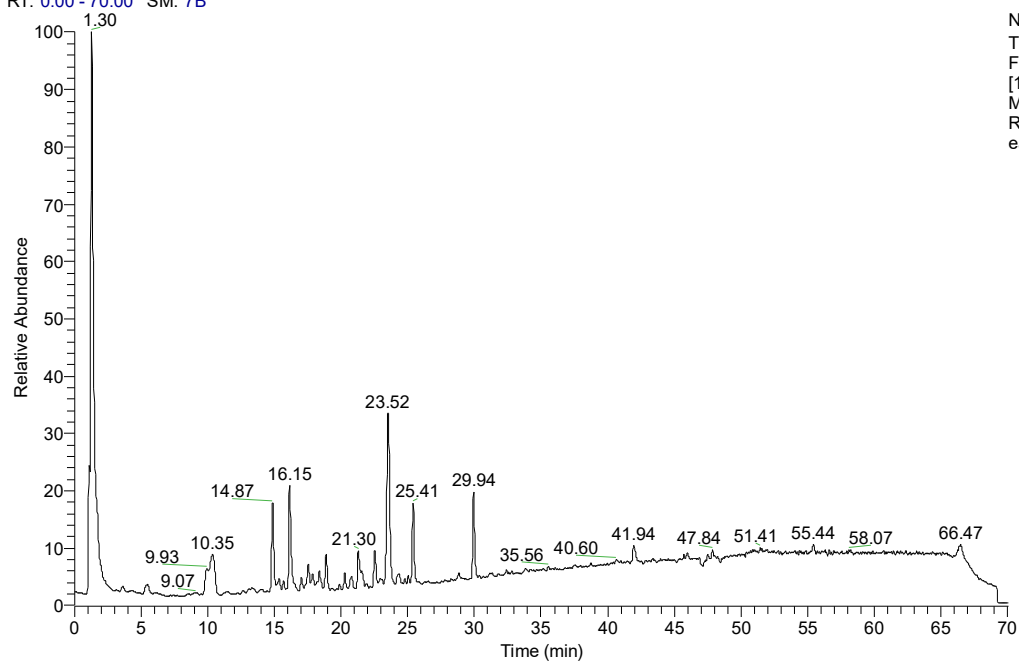

NL: 2.92E9  
TIC F: FTMS - p ESI  
Full ms  
[100.0000-1500.0000]  
MS  
Rhizophora\_racemosa\_l  
eaves\_infusion\_neg

(b)

Figure S1. Total ion chromatograms of leaves infusion in positive (a) and negative (b) mode

RT: 0.00 - 70.00 SM: 7B

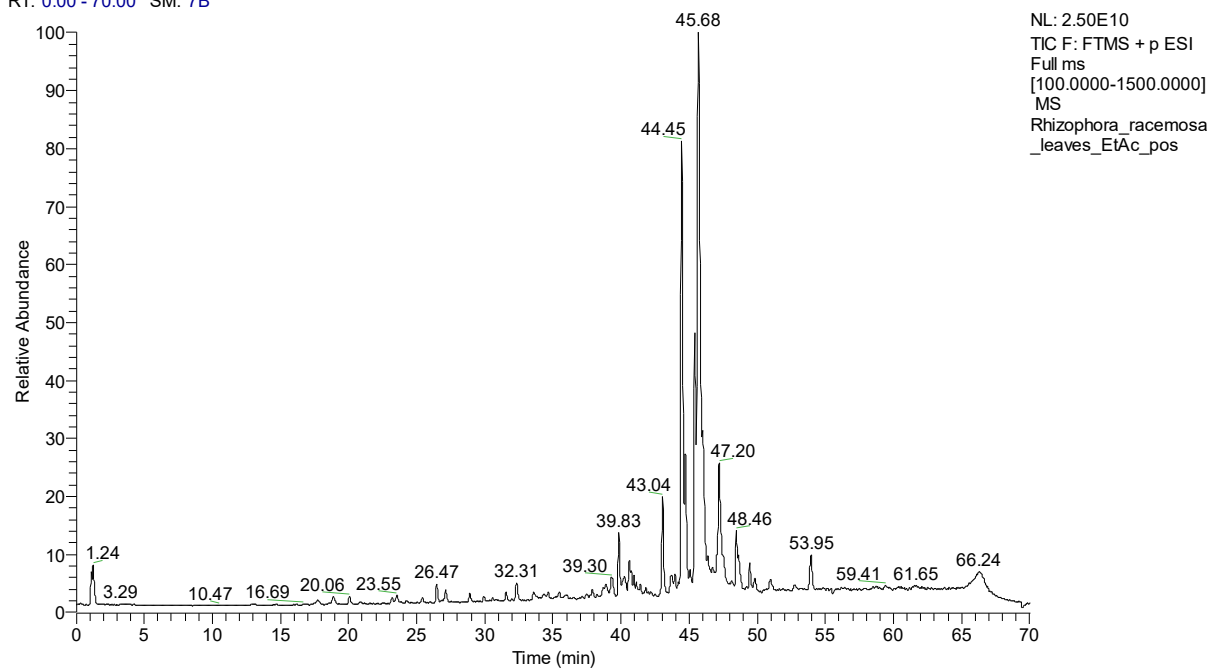

(a)

RT: 0.00 - 70.00 SM: 7B

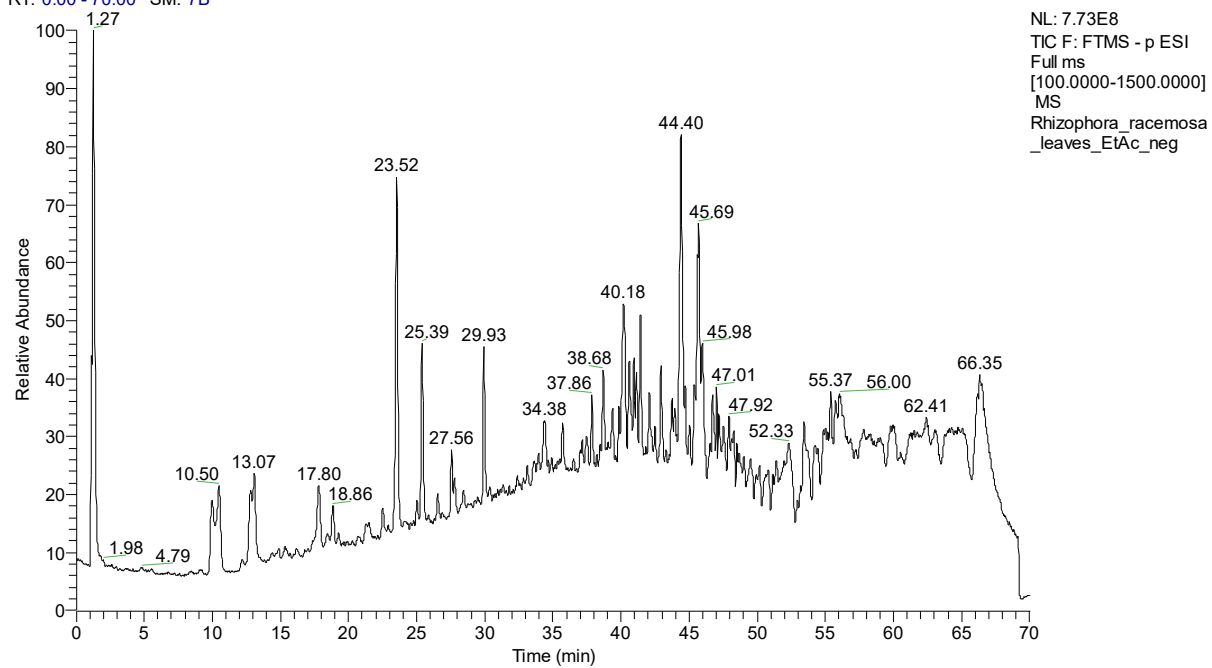

(b)

Figure S2. Total ion chromatograms of leaves ethyl acetate extract in positive (a) and negative (b) mode

RT: 0.00 - 70.00 SM: 7B

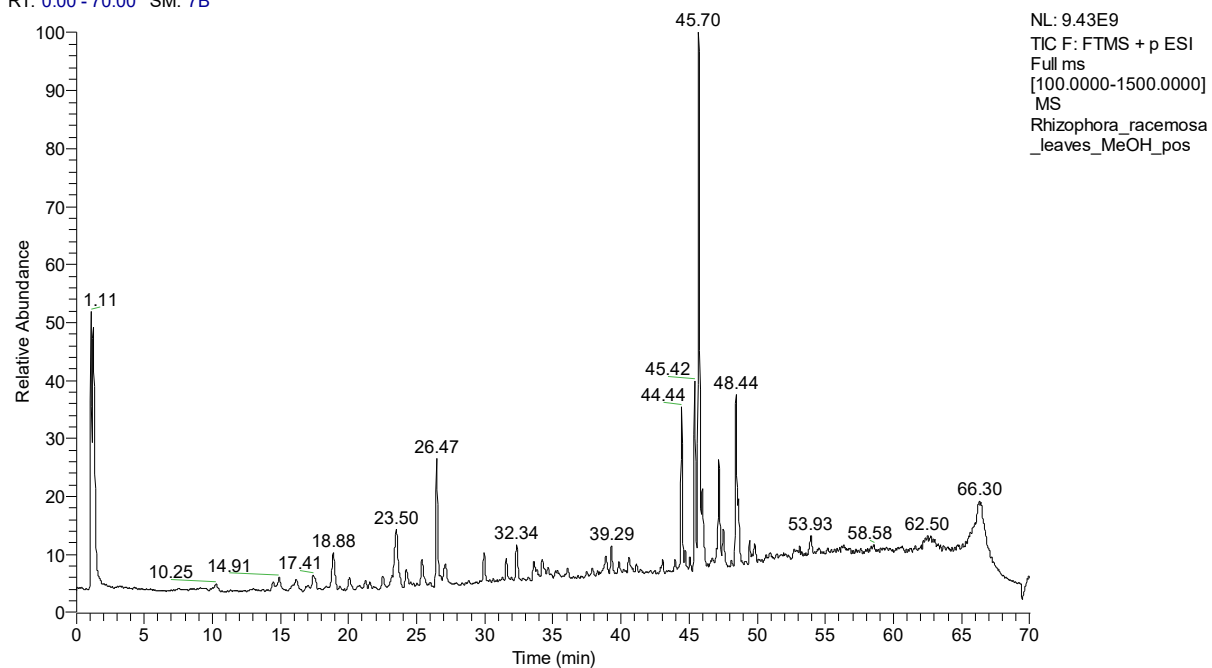

(a)

RT: 0.00 - 70.00 SM: 7B

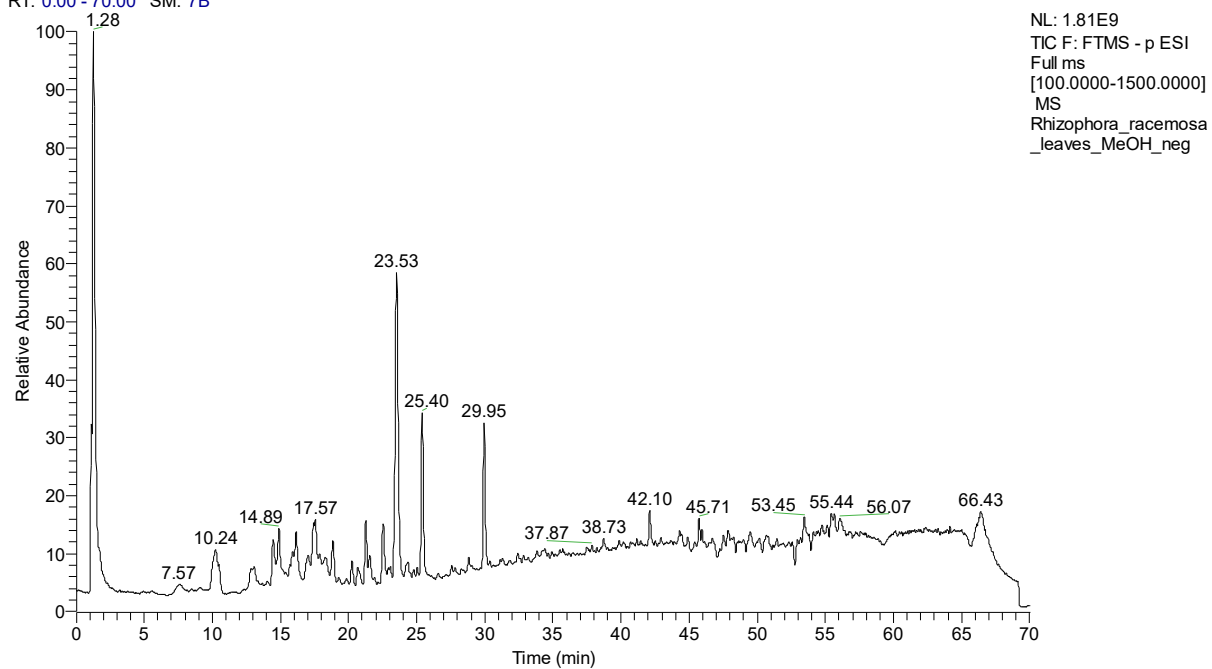

(b)

Figure S3. Total ion chromatograms of leaves methanol extract in positive (a) and negative (b) mode

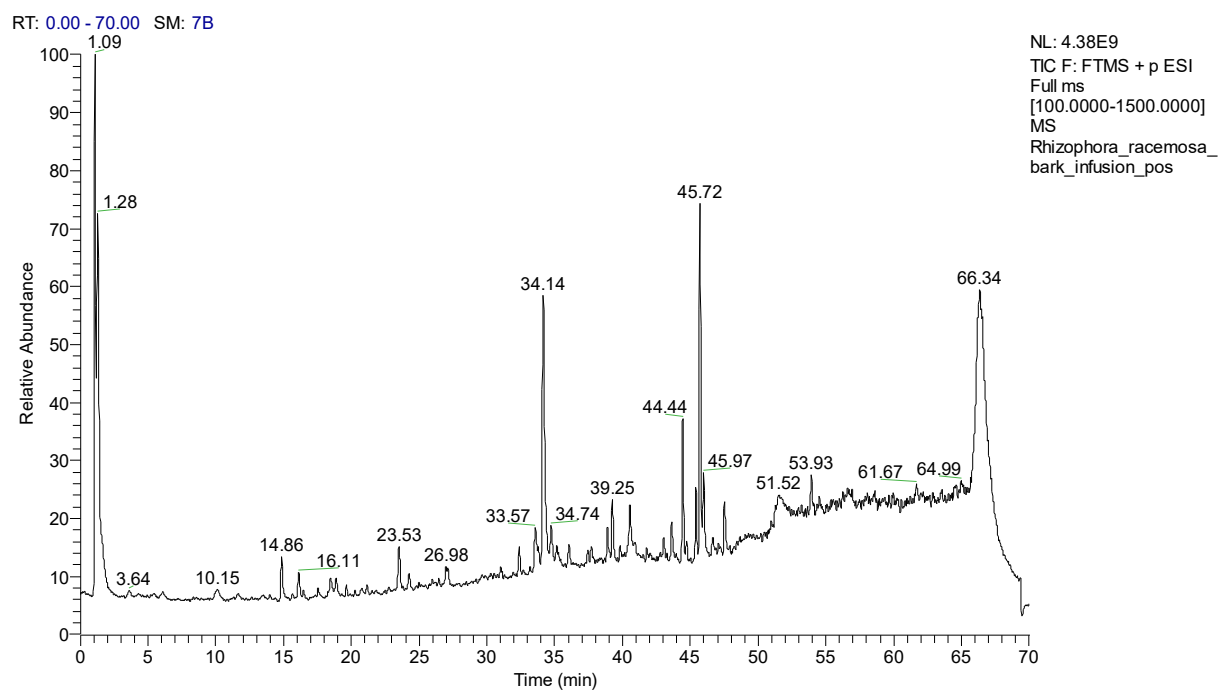

(a)

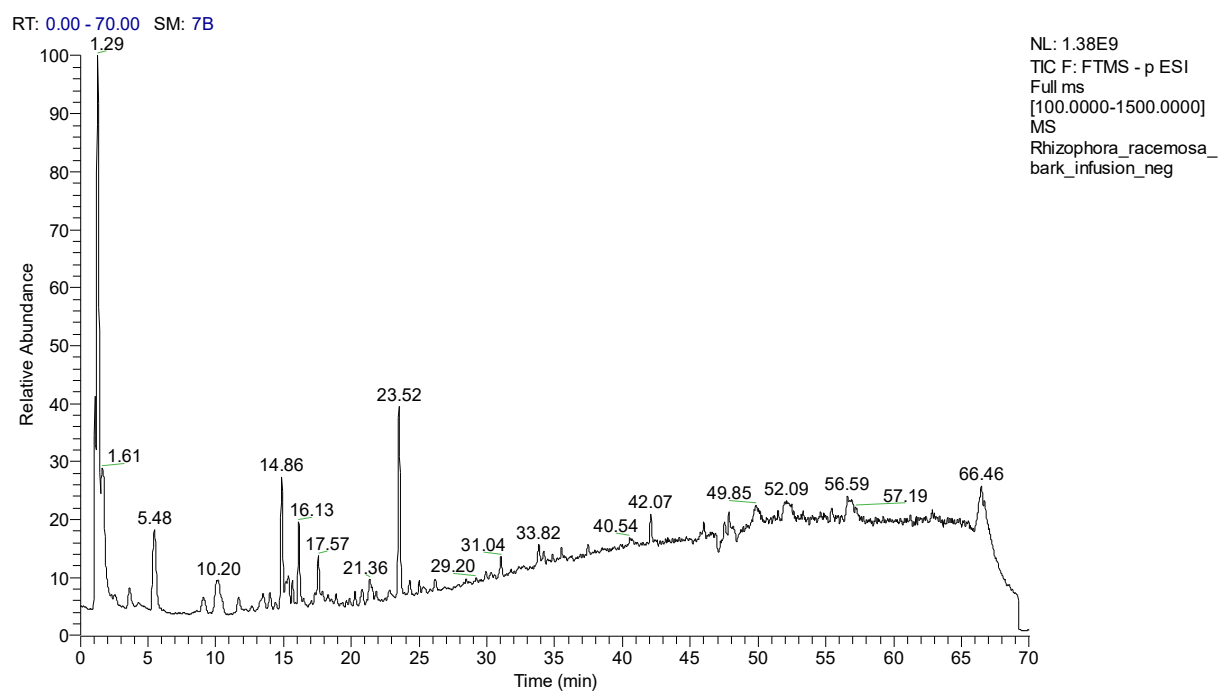

(b)

Figure S4. Total ion chromatograms of bark infusion in positive (a) and negative (b) mode



RT: 0.00 - 70.00 SM: 7B

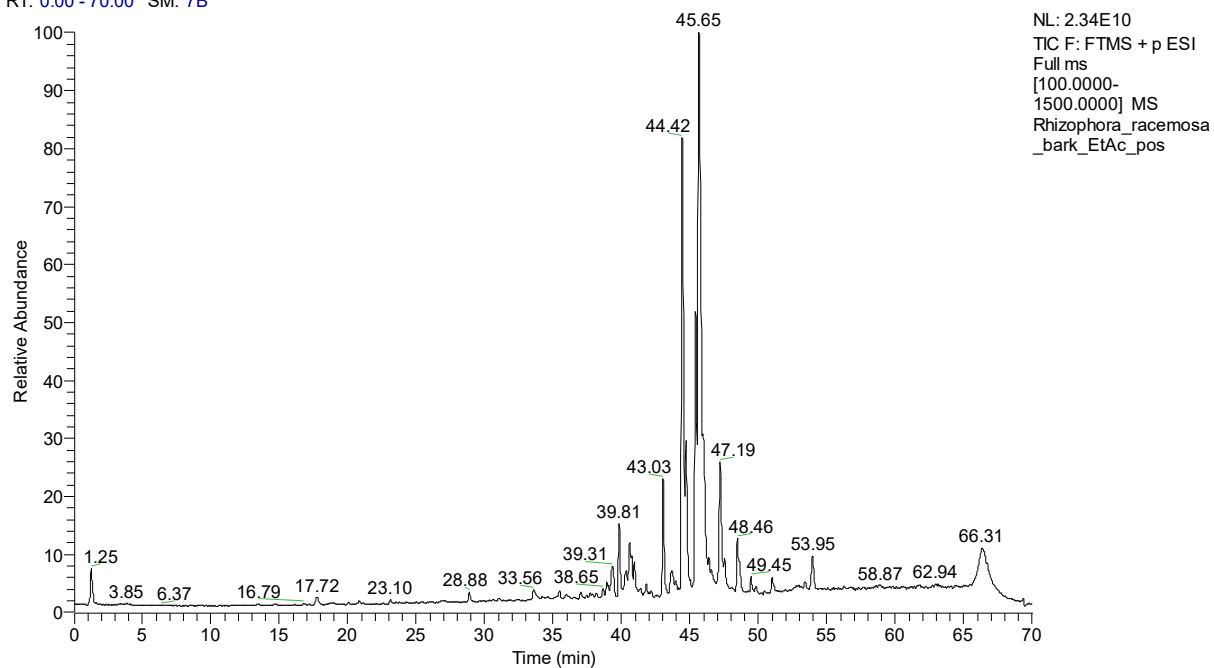

(a)

RT: 0.00 - 70.01 SM: 7B

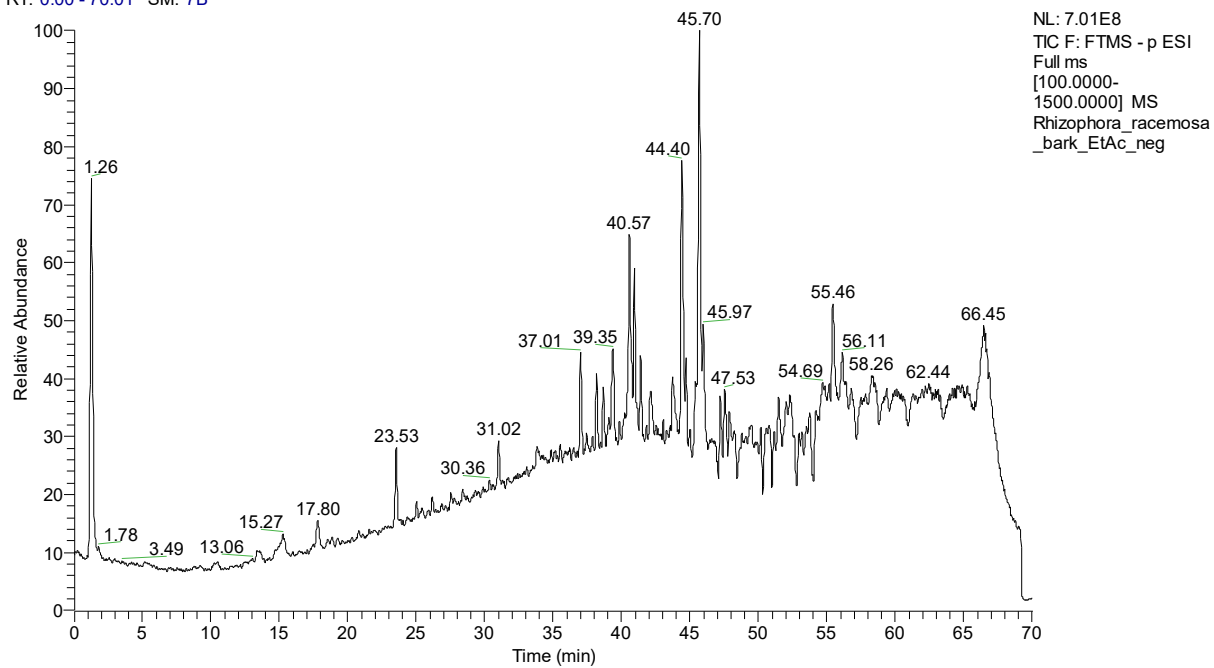

(b)

Figure S5. Total ion chromatograms of bark ethyl acetate in positive (a) and negative (b) mode

RT: 0.00 - 70.00 SM: 7B

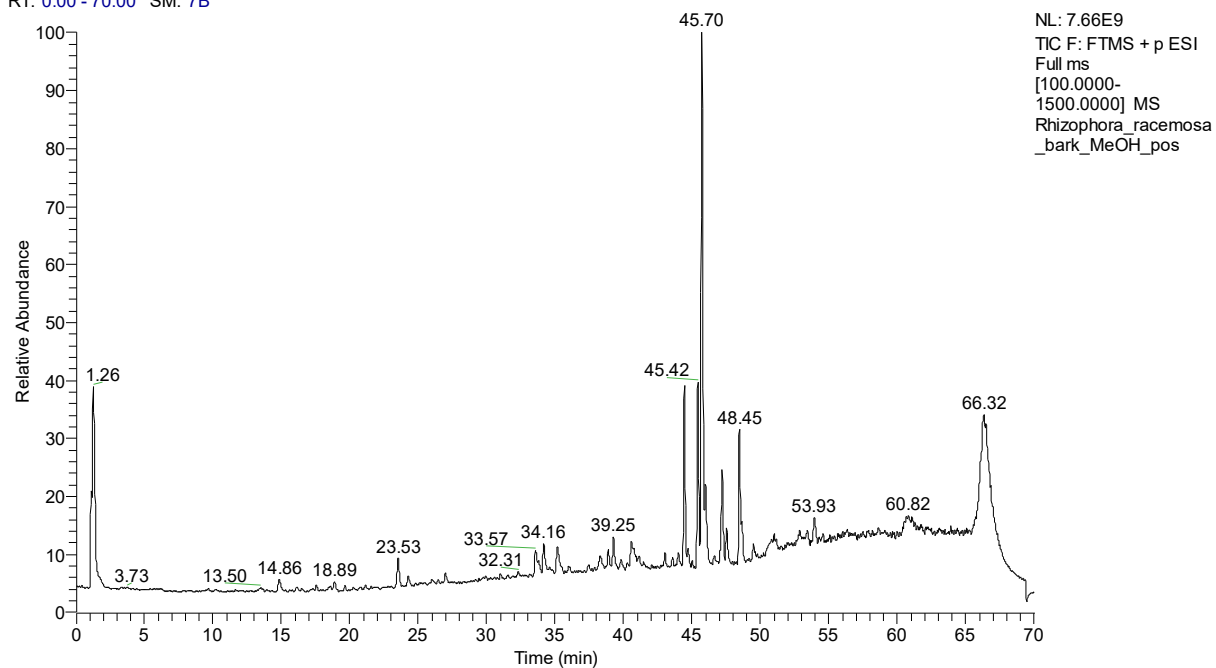

(a)

RT: 0.00 - 70.01 SM: 7B

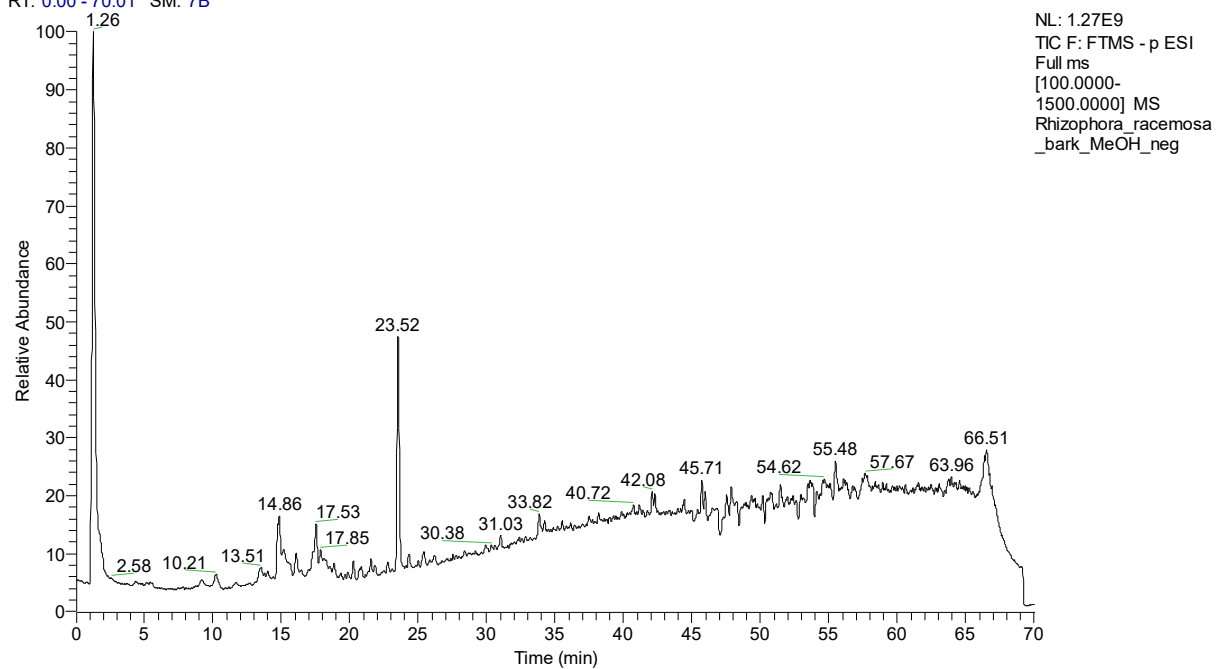

(b)

Figure S5. Total ion chromatograms of bark methanol in positive (a) and negative (b) mode

RT: 9.92 - 30.00 SM: 7B

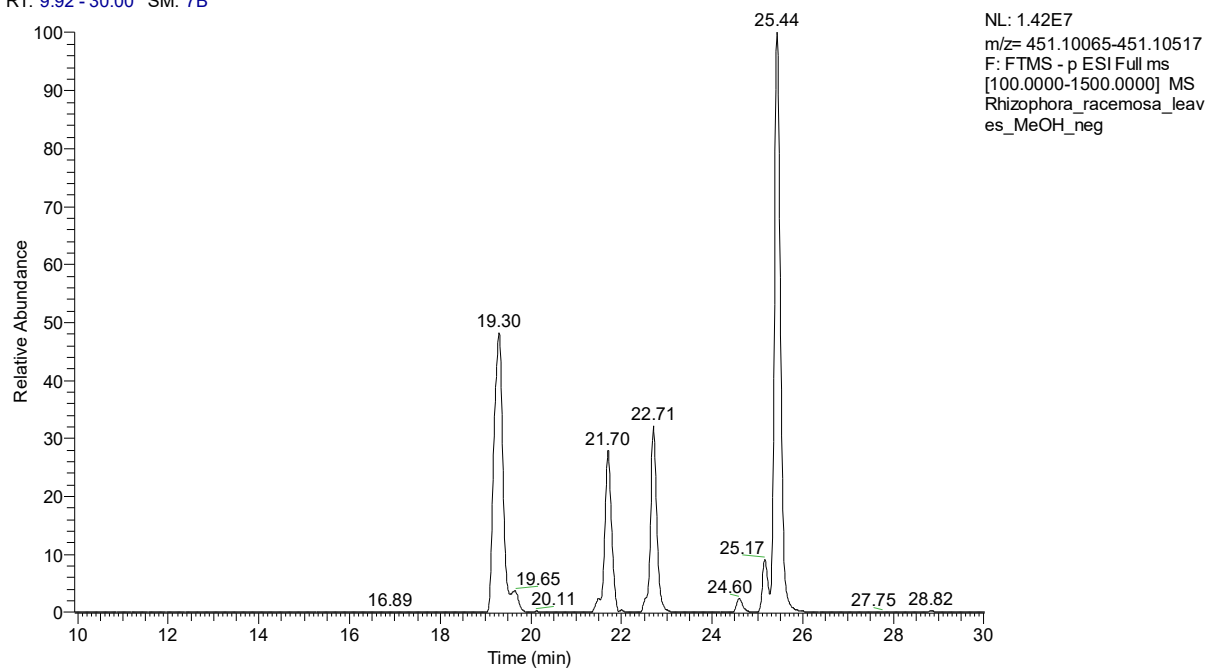

Figure S6. Extracted Ion Chromatogram (XIC) of Cinchonain I Isomers in Methanolic Extract of Leaves

Rhizophora\_racemosa\_leaves\_MeOH\_neg #12489 RT: 25.44 AV: 1 NL: 2.65E6  
F: FTMS - p ESI d Full ms2 451.0567@hcd35.00 [50.0000-480.0000]

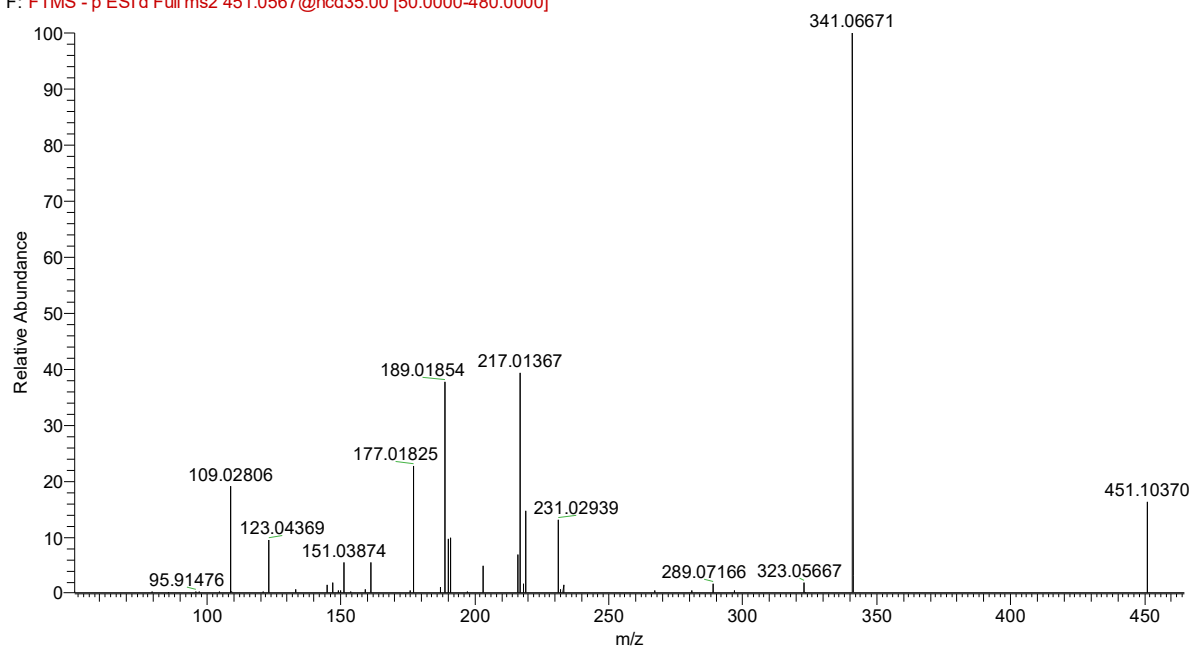

Figure S6. MS2 spectrum of Cinchonain I Isomer at Retention Time 25.44 minutes

RT: 9.97 - 29.98 SM: 7B

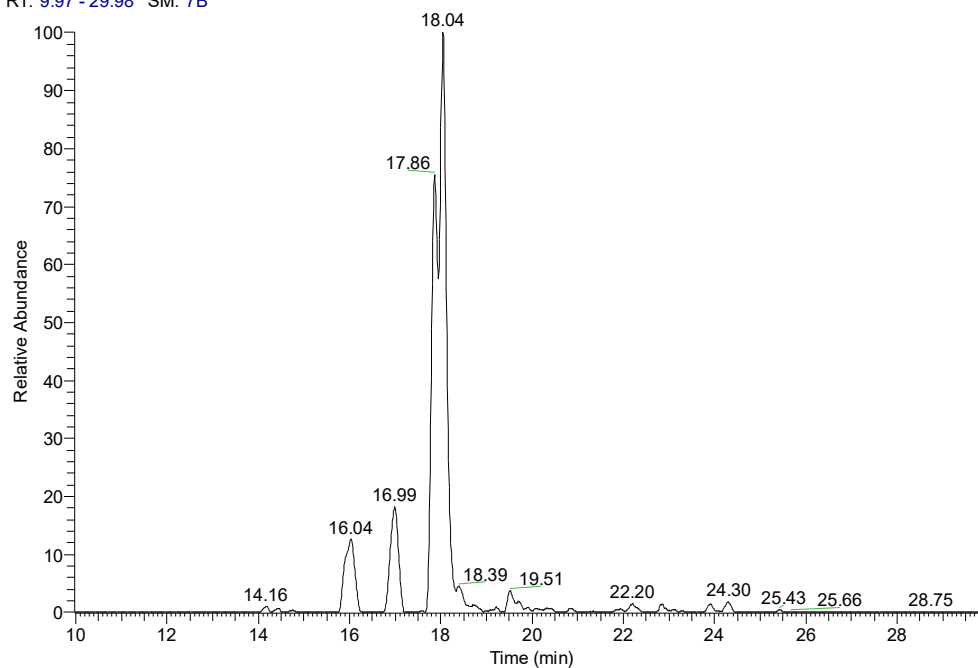

NL: 3.18E6  
m/z= 739.16260-739.17000  
F: FTMS - p ESI Full ms  
[100.0000-1500.0000] MS  
Rhizophora\_racemosa\_bark  
\_MeOH\_neg

Figure S7. Extracted Ion Chromatogram (XIC) of Cinchonain II Isomers in Methanolic Extract of Bark

Rhizophora\_racemosa\_bark\_MeOH\_neg #8660 RT: 18.09 AV: 1 NL: 5.61E5  
F: FTMS - p ESI d Full ms2 739.1048@hcd35.00 [51.3333-770.0000]

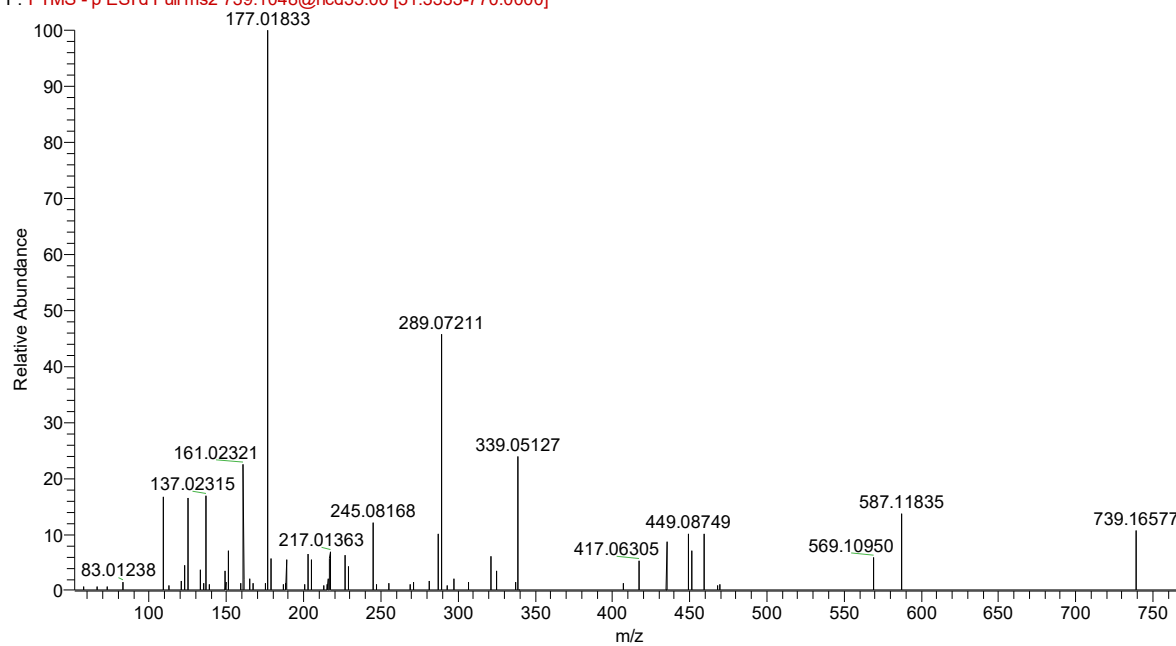

Figure S8. MS2 spectrum of Cinchonain II Isomer at Retention Time 18.04 minutes

## References

1. Uysal, S.; Zengin, G.; Locatelli, M.; Bahadori, M. B.; Mocan, A.; Bellagamba, G.; De Luca, E.; Mollica, A.; Aktumsek, A., Cytotoxic and enzyme inhibitory potential of two *Potentilla* species (*P. speciosa* L. and *P. reptans* Willd.) and their chemical composition. *Frontiers in pharmacology* **2017**, *8*, 290.
2. Grochowski, D. M.; Uysal, S.; Aktumsek, A.; Granica, S.; Zengin, G.; Ceylan, R.; Locatelli, M.; Tomczyk, M., In vitro enzyme inhibitory properties, antioxidant activities, and phytochemical profile of *Potentilla thuringiaca*. *Phytochemistry Letters* **2017**, *20*, 365-372.
